# Supplementary material for: Intense Simulation-Based Surgical Education for Manual Small-Incision Cataract Surgery: The Ophthalmic Learning and Improvement Initiative in Cataract Surgery Randomized Clinical Trial in Kenya, Tanzania, Uganda, and Zimbabwe
Source: PubMed Central journal article supplement — JAMA Ophthalmol. 2020 Nov 5;139(1):9–15. doi: 10.1001/jamaophthalmol.2020.4718 (PMC7645744; doi:10.1001/jamaophthalmol.2020.4718), 2020-11-05
Supplement: jamaophthalmol-e204718-s001.pdf [file jamaophthalmol-e204718-s001.pdf]

1  
2  
  
3  
4  
5  
6  
7  
8  
9  
10  
11  
12  
13  
14  
15  
16  
17  
18  
19  
20  
21  
22  
23  
24  
25  
26  
27  
28  
29  
30  
31  
32  
33  
34  
35  
36  
37  
38  
39

# THE OPHTHALMIC LEARNING AND IMPROVEMENT INITIATIVE IN CATARACT SURGERY (OLIMPICS) TRIAL: RANDOMISED-CONTROLLED TRIAL COMPARING INTENSE SIMULATION-BASED SURGICAL EDUCATION FOR CATARACT SURGERY TO CONVENTIONAL TRAINING ALONE IN EAST AND SOUTHERN AFRICA

## STUDY PROTOCOL

Principle Investigator (Africa) / PhD Student: Dr William H Dean FRCOphth MEd MBChB BSc<sup>1,2</sup>

Principle Investigator (LSHTM): Prof. Matthew Burton PhD FRCOphth<sup>1</sup>

Co-Investigators:

Dr Simon Arunga<sup>1,3</sup> FCOECSA MMed(Oph) MBChB

Dr John Buchan<sup>1</sup> MBBS FRCOphth MD

Prof Colin Cook<sup>2</sup> MBChB DO MPH FRCOphth FCS(Ophth)SA

Dr Stephen Gichuhi<sup>4</sup> PhD MMed

Dr Agrippa Mukome<sup>5</sup> MBChB MMed

Dr William U Makupa<sup>6</sup> MD, MMed Ophth, FCOphth ECSA, VRS

Dr Juliet Oti<sup>7</sup> MBChB MMed(Ophth)

<sup>1</sup> London School of Hygiene and Tropical Medicine, UK

<sup>2</sup> University of Cape Town, South Africa

<sup>3</sup> Mbarara University of Science and Technology, Uganda

<sup>4</sup> University of Nairobi, Kenya

<sup>5</sup> University of Zimbabwe, Harare

<sup>6</sup> Kilimanjaro Christian Medical Centre, Tanzania

<sup>7</sup> Makerere University, Uganda

40 This protocol describes the Intense Simulation-Based Ophthalmic Surgical Education vs.  
41 Conventional Training Alone study, and provides information about procedures for selecting  
42 participants and the training involved.

43

44 The protocol should not be used as a replacement curriculum for current surgical training.

45

46 Questions relating to this educational-intervention study should be referred, in the first instance, to  
47 the primary investigator and trainer, Dr Will Dean: [will.dean@lshtm.ac.uk](mailto:will.dean@lshtm.ac.uk)

48

49 This trial will adhere to the principles outlined in the International Conference on Harmonisation  
50 Good Clinical Practice (ICH GCP) guidelines, protocol and all applicable local and training programme  
51 regulations.

52

|     |                                                                                                                                                                                 |    |
|-----|---------------------------------------------------------------------------------------------------------------------------------------------------------------------------------|----|
| 53  | <b>Table of Contents</b>                                                                                                                                                        |    |
| 54  | <b>Glossary of Abbreviations</b> .....                                                                                                                                          | 6  |
| 55  | <b>Keywords</b> .....                                                                                                                                                           | 6  |
| 56  | <b>General Information</b> .....                                                                                                                                                | 7  |
| 57  | <i>Project Title</i> .....                                                                                                                                                      | 7  |
| 58  | <i>Identifying numbers</i> .....                                                                                                                                                | 7  |
| 59  | <i>Principle Investigator</i> .....                                                                                                                                             | 7  |
| 60  | <i>Coordinating Research Institution</i> .....                                                                                                                                  | 7  |
| 61  | <i>Collaborating Training Institutions</i> .....                                                                                                                                | 7  |
| 62  | <i>Study Sponsor</i> .....                                                                                                                                                      | 8  |
| 63  | <i>Study Funders</i> .....                                                                                                                                                      | 8  |
| 64  | <b>Study Summary</b> .....                                                                                                                                                      | 9  |
| 65  | <b><i>OLIMPICS Trial</i></b> .....                                                                                                                                              | 9  |
| 66  | <b><i>The primary outcome will be the procedure-specific repeated measures analysis of OSCAR score of three live SICS surgical procedures performed at 12-months.</i></b> ..... | 9  |
| 67  |                                                                                                                                                                                 |    |
| 68  | <b>Study Outline Reference Diagram</b> .....                                                                                                                                    | 12 |
| 69  | <b>Executive Summary</b> .....                                                                                                                                                  | 13 |
| 70  | <b>Background</b> .....                                                                                                                                                         | 14 |
| 71  | The burden of cataract and glaucoma in sub-Saharan Africa .....                                                                                                                 | 14 |
| 72  | Surgical training in Sub-Saharan Africa .....                                                                                                                                   | 14 |
| 73  | Cataract Surgery .....                                                                                                                                                          | 15 |
| 74  | <i>Outcomes of Cataract Surgery</i> .....                                                                                                                                       | 16 |
| 75  | Surgical Education and Simulation .....                                                                                                                                         | 16 |
| 76  | Simulation in Ophthalmic Surgical Training .....                                                                                                                                | 17 |
| 77  | Assessment tools in ophthalmic surgical training.....                                                                                                                           | 18 |
| 78  | <i>OSCAR (ophthalmology surgical competency assessment rubric) origins</i> .....                                                                                                | 19 |
| 79  | Existing Simulation-Based Surgical Training and Assessment in Ophthalmology: Validity and                                                                                       |    |
| 80  | Research .....                                                                                                                                                                  | 19 |
| 81  | Ophthalmology Simulation-Based Surgical Training Pilots in SICS and Glaucoma Surgery:                                                                                           |    |
| 82  | Development of the OLIMPICS Study and GLASS Trial Interventions.....                                                                                                            | 20 |
| 83  | <i>Development of the Training Curriculum</i> .....                                                                                                                             | 20 |
| 84  | Economics of Surgical Education .....                                                                                                                                           | 21 |
| 85  | <b>Rationale</b> .....                                                                                                                                                          | 23 |
| 86  | <b>Objectives</b> .....                                                                                                                                                         | 24 |
| 87  | Overall Objective.....                                                                                                                                                          | 24 |
| 88  | Specific Objectives.....                                                                                                                                                        | 24 |
| 89  | <b>Methodology</b> .....                                                                                                                                                        | 25 |
| 90  | Design Summary.....                                                                                                                                                             | 25 |
| 91  | Study Setting.....                                                                                                                                                              | 25 |
| 92  | Study Duration.....                                                                                                                                                             | 25 |
| 93  | Study Participants .....                                                                                                                                                        | 25 |
| 94  | Inclusion / Exclusion Criteria.....                                                                                                                                             | 25 |
| 95  | <i>OLIMPICS Trial (SICS):</i> .....                                                                                                                                             | 25 |
| 96  | <i>Inclusion Criteria</i> .....                                                                                                                                                 | 25 |
| 97  | <i>Exclusion Criteria</i> .....                                                                                                                                                 | 25 |
| 98  | Informed Consent.....                                                                                                                                                           | 26 |
| 99  | Withdrawal Criteria.....                                                                                                                                                        | 26 |
| 100 | Pre-randomisation baseline assessment.....                                                                                                                                      | 27 |
| 101 | Randomisation.....                                                                                                                                                              | 27 |

|     |                                                                          |                                     |
|-----|--------------------------------------------------------------------------|-------------------------------------|
| 102 | Sequence generation.....                                                 | 27                                  |
| 103 | Allocation Concealment .....                                             | 27                                  |
| 104 | Randomisation Implementation .....                                       | 27                                  |
| 105 | Trial Arms.....                                                          | 27                                  |
| 106 | A) Simulation-based training “intervention” arm:.....                    | 27                                  |
| 107 | Table 2: <b>OLIMPICS Trial (SICS) Training Programme</b> .....           | 29                                  |
| 108 | B) Standard conventional training “control” arm: .....                   | 30                                  |
| 109 | Outcomes .....                                                           | 30                                  |
| 110 | Primary Outcome – OLIMPICS Trial.....                                    | 30                                  |
| 111 | Secondary Outcomes: .....                                                | 30                                  |
| 112 | Qualitative Outcomes / Additional Exploratory Analysis: .....            | 31                                  |
| 113 | Analysis.....                                                            | 31                                  |
| 114 | Statistical analysis.....                                                | 31                                  |
| 115 | Qualitative analysis.....                                                | 31                                  |
| 116 | Cost-effectiveness analysis .....                                        | <b>Error! Bookmark not defined.</b> |
| 117 | Sample size.....                                                         | 32                                  |
| 118 | Table 4: Range of Effect Sizes.....                                      | 32                                  |
| 119 | Prevention of Bias .....                                                 | 32                                  |
| 120 | <b>Observer Bias</b> .....                                               | 33                                  |
| 121 | Figure 6. Video recording and marking flow diagram .....                 | 34                                  |
| 122 | Table 5: Risk of bias criteria assessment.....                           | 35                                  |
| 123 | Benefits of the Study .....                                              | 35                                  |
| 124 | Benefits to the study participants.....                                  | 35                                  |
| 125 | General benefits .....                                                   | 36                                  |
| 126 | Risks.....                                                               | 36                                  |
| 127 | Training Timetable: .....                                                | 36                                  |
| 128 | <b>Data Management .....</b>                                             | <b>38</b>                           |
| 129 | <b>Expected Outcomes of the Study .....</b>                              | <b>38</b>                           |
| 130 | <b>Quality Assurance .....</b>                                           | <b>38</b>                           |
| 131 | Good Clinical Practice .....                                             | 38                                  |
| 132 | Data management.....                                                     | 38                                  |
| 133 | <b>Project Management .....</b>                                          | <b>38</b>                           |
| 134 | Study Management .....                                                   | 39                                  |
| 135 | Advisory Panel .....                                                     | 39                                  |
| 136 | Funding.....                                                             | 39                                  |
| 137 | Medical Registration .....                                               | 39                                  |
| 138 | Trial Registration.....                                                  | 39                                  |
| 139 | Data and safety management .....                                         | 39                                  |
| 140 | <b>Ethical Considerations.....</b>                                       | <b>40</b>                           |
| 141 | Ethical Approval.....                                                    | 40                                  |
| 142 | Patient Informed Consent.....                                            | 40                                  |
| 143 | Participant / Trainee Informed Consent .....                             | 40                                  |
| 144 | <b>Dissemination of Results and Publication Policy.....</b>              | <b>42</b>                           |
| 145 | <b>References .....</b>                                                  | <b>43</b>                           |
| 146 | <b>Appendices .....</b>                                                  | <b>47</b>                           |
| 147 | Appendix 1 Informed Consent Forms & Participant Information Sheets ..... | 47                                  |
| 148 | Appendix 2 Budget.....                                                   | 47                                  |
| 149 | Appendix 3 OSSCARs and OSCAR.....                                        | 47                                  |
| 150 | Appendix 4 Questionnaire .....                                           | 47                                  |
| 151 | Appendix 5 Semi-structured Interview & Confidence Scoring.....           | 47                                  |
| 152 | Appendix 6 Patient Consent to Clinical Photography Form .....            | 47                                  |

|     |                     |                                                            |           |
|-----|---------------------|------------------------------------------------------------|-----------|
| 153 | <b>Appendix 1a</b>  | <b>Participant Consent Form (SOS).....</b>                 | <b>48</b> |
| 154 | <b>Appendix 1c</b>  | <b>Participant Information Sheet – SICS Training.....</b>  | <b>50</b> |
| 155 | <b>Appendix 3a.</b> | <b>SICS OSSCAR.....</b>                                    | <b>56</b> |
| 156 | <b>Appendix 3c.</b> | <b>SICS OSCAR.....</b>                                     | <b>58</b> |
| 157 | <b>Appendix 5a</b>  | <b>Interview Outline .....</b>                             | <b>61</b> |
| 158 | <b>Appendix 5b</b>  | <b>Confidence Ratings.....</b>                             | <b>63</b> |
| 159 | <b>Appendix 6a.</b> | <b>Consent to Clinical Photography Form .....</b>          | <b>64</b> |
| 160 | <b>Appendix 6b.</b> | <b>Consent to Clinical Photography Form - Swahili.....</b> | <b>66</b> |
| 161 |                     |                                                            |           |
| 162 |                     |                                                            |           |
| 163 |                     |                                                            |           |

## 164 Glossary of Abbreviations

165

166

167

|     |          |                                                                  |
|-----|----------|------------------------------------------------------------------|
| 168 | ACGME    | Accreditation Council for Graduate Medical Education             |
| 169 | BCPB     | British Council for the Prevention of Blindness                  |
| 170 | CBM      | Christian Blind Mission                                          |
| 171 | CEHI     | Community Eye Health Institute                                   |
| 172 | COECSA   | College of Ophthalmology of Eastern Central & Southern Africa    |
| 173 | COSECSA  | College of Surgery of Eastern Central and Southern Africa        |
| 174 | CPD      | Continuing professional development                              |
| 175 | ESSAT    | Eye surgical skills assessment test                              |
| 176 | FRCOphth | Fellow of the Royal College of Ophthalmologists (UK)             |
| 177 | GCP      | Good Clinical Practice                                           |
| 178 | GLASS    | Glaucoma Simulated Surgery                                       |
| 179 | GMC      | General Medical Council                                          |
| 180 | IAPB     | International Agency for the Prevention of Blindness             |
| 181 | ICEH     | International Centre for Eye Health                              |
| 182 | ICO      | International Council of Ophthalmology                           |
| 183 | ITT      | Intention-to-treat                                               |
| 184 | KCMC     | Kilimanjaro Christian Medical Centre                             |
| 185 | LSHTM    | London School of Hygiene & Tropical Medicine                     |
| 186 | LMIC     | Low & middle income countries                                    |
| 187 | MCQ      | Multiple choice question examination                             |
| 188 | MEd      | Masters in Education                                             |
| 189 | MMed     | Masters in Medicine                                              |
| 190 | MURHEC   | Mbarara University & Referral Hospital Eye Centre                |
| 191 | OASIS    | Objective assessment of skills in intra-ocular surgery           |
| 192 | OLIMPICS | Ophthalmic Learning & Improvement Initiative in Cataract Surgery |
| 193 | OSACSS   | Objective structured assessment of cataract surgical skill       |
| 194 | OSCAR    | Ophthalmology Surgical Competency Assessment Rubric              |
| 195 | OSSCAR   | Ophthalmic Simulated Surgical Competency Assessment Rubric       |
| 196 | PCR      | Posterior capsule rupture                                        |
| 197 | PI       | Principal investigator                                           |
| 198 | RCOphth  | The Royal College of Ophthalmologists, UK                        |
| 199 | RCT      | Randomised controlled trial                                      |
| 200 | SDP      | Sustained deliberate practice                                    |
| 201 | SICS     | Small-incision cataract surgery                                  |
| 202 | SOS      | Simulated ocular surgery                                         |
| 203 | SSA      | Sub-Saharan Africa                                               |
| 204 | STU      | Surgery Training Unit                                            |
| 205 | UCT      | University of Cape Town                                          |
| 206 | VA       | Visual acuity                                                    |
| 207 | VL       | Vitreous loss                                                    |
| 208 | WHO      | World Health Organisation                                        |

209

## 210 Keywords

211

212 Simulation, Surgical Education, Training, Africa, Cataract, Glaucoma, Ophthalmic

213

214

215

## 216 General Information

### 217 Project Title

218

219 The Simulated Ocular Surgery (SOS) Trials: Randomised-Controlled Trials Comparing Intense  
220 Simulation-Based Surgical Education for Cataract and Glaucoma Surgery to Conventional Training  
221 Alone in Southern East Africa.

222

### 223 Identifying numbers

224 LSHTM Application Reference Number: **11795**

225 UCT Departmental Research Committee Reference: **2016/191**

226 UCT HREC (Human research ethics committee): **259/2017**

227 Kenyatta National Hospital - University of Nairobi Ethics Research Committee: **P473/08/2017**

228 Makerere University SOMREC (School of Medicine Research Ethics Committee): **00002062**

229 Mbarara University REC: **13/06-17**

230 Uganda National Council for Science & Technology: **HS2302**

231 KCMC RERC: **2027/1070**

232 National Institute for Medical Research (Tanzania): **NIMR/HQ/R.8a/Vol.IX/2765**

233 University of Zimbabwe Joint Research Ethics Committee: **259/17**

234 Pan-African Clinical Trial Registry: **PACTR201803002159198** (date of registration:30/3/2017)

235

236

### 237 Principle Investigator

238 Dr William Dean FRCOphth MEd MBChB BSc

239

240 International Centre for Eye Health, Clinical Research Department, Faculty of Infectious and Tropical  
241 Diseases, London School of Hygiene & Tropical Medicine, Keppel Street, London, WC1E 7HT, UK

242

243 Mobile/Cell: UK +44 (0) 7899 753 953

244 RSA +27 (0) 710 701 272

### 245 Coordinating Research Institution

246 London School of Hygiene & Tropical Medicine

247

### 248 Collaborating Training Institutions

249 • Department of Ophthalmology, University of Nairobi, Kenyatta National Hospital, PO Box  
250 19676, Nairobi – 00202, Kenya.

251 • Department of Ophthalmology, School of Medicine, PO Box 7062, Makerere University,  
252 Kampala, Uganda.

253 • Mbarara University & Referral Hospital Eye Centre (MURHEC), Mbarara University of Science  
254 and Technology, PO BOX 1410, Mbarara, Uganda.

255 • Kilimanjaro Christian Medical Centre (KCMC), Moshi, Tanzania.

256 • Department of Ophthalmology, University of Zimbabwe, Churchill Avenue, Mount Pleasant,  
257 Harare, Zimbabwe.

258 • Division of Ophthalmology, Groote Schuur Hospital and Red Cross Children's Hospital,  
259 University of Cape Town (UCT), South Africa.

260

261

262

263 Study Sponsor

264 London School of Hygiene & Tropical Medicine is the main research sponsor for this study. For  
265 further information regarding the sponsorship conditions, please contact the Research Governance  
266 and Integrity Office:

267

268 London School of Hygiene & Tropical Medicine

269 Keppel Street

270 London WC1E 7HT

271 Tel: +44 207 927 2626

272

273

274 Study Funders

275 • British Council for the Prevention of Blindness (London, UK)

276 • Ulverscroft Foundation (Leicester, UK)

277 • CBM (Greenville, SC, USA)

278 • Queen Elisabeth Diamond Jubilee Trust (London., UK)

279 • Orbis International (New York, USA)

280 • L'Occitane Foundation (Paris, France)

281

282



## Study Summary

|                         |                                                                                                                                                                                                                                                                                                                                                                                                                                                                                                                                                                                                                                                                                                                                                                                                                                     |
|-------------------------|-------------------------------------------------------------------------------------------------------------------------------------------------------------------------------------------------------------------------------------------------------------------------------------------------------------------------------------------------------------------------------------------------------------------------------------------------------------------------------------------------------------------------------------------------------------------------------------------------------------------------------------------------------------------------------------------------------------------------------------------------------------------------------------------------------------------------------------|
| <b>Title</b>            | The Simulated Ocular Surgery (SOS) Trials: Randomised-Controlled Trials Comparing Intense Simulation-Based Surgical Education for Cataract and Glaucoma Surgery to Conventional Training Alone in East and Southern Africa.                                                                                                                                                                                                                                                                                                                                                                                                                                                                                                                                                                                                         |
| <b>Design</b>           | <p>Prospective, single-masked randomised controlled education-intervention trials of intense simulation-based surgical education versus current standard conventional training alone, of ophthalmologists-in-training in five East and Southern African countries.</p> <p>Two separate trials:<br/>           (1) OLIMPICS*: cataract surgery simulation training vs conventional alone; and<br/>           (2) GLASS**: glaucoma surgery simulation training vs conventional training alone.<br/>           *<i>Ophthalmic learning &amp; improvement initiative in cataract surgery.</i><br/>           ** <i>Glaucoma simulated surgery</i></p>                                                                                                                                                                                  |
| <b>Aims</b>             | To investigate whether enhanced simulation-based surgical education improves competence, knowledge, surgical outcomes, and confidence.                                                                                                                                                                                                                                                                                                                                                                                                                                                                                                                                                                                                                                                                                              |
| <b>Intervention</b>     | All participants will (by the end of the study) receive the educational intervention of ‘six-days intense simulation-based training’ at the Surgical Training Unit, University of Cape Town. The intervention groups will receive this training at week one; and the matched controls after a period of one year. The ‘intervention training’ specifically is a six-day intense course of lectures, small-group teaching, practical surgical simulation training, videos, and assessments. <b><i>This training is in addition to, and an enhancement of the trainees’ normal current standard conventional training, and not designed to replace it.</i></b>                                                                                                                                                                        |
| <b>Control Training</b> | Control, or standard/conventional, training will be variable between countries, training institutions, and individuals. Typically, training involved a weekly timetable of clinics (general or specialist), theatre sessions (cataract, or specialist), research, and teaching. This ‘control’ training will be monitored for the first three months of all participants in terms of numbers of clinical and surgical sessions.                                                                                                                                                                                                                                                                                                                                                                                                     |
| <b>Outcome measures</b> | <p>Assessments and follow-up time points are at baseline (month 0, and week 1), 3 months, 12 months and 15 months.</p> <p><b><i>Primary outcome measure:</i></b> mean global competency assessment score at twelve-months post-training intervention:</p> <p><b><i>OLIMPICS Trial</i></b></p> <p><i>The primary outcome will be the procedure-specific repeated measures analysis of OSCAR score of three live SICS surgical procedures performed at 12-months.</i></p> <p><b><i>Secondary outcome measures:</i></b></p> <ul style="list-style-type: none"> <li>• OSSCAR(Simulation) assessments at 3-months for the OLIMPICS Trial; mean value of three replicates, performed in the same manner as per the primary outcome measure.</li> <li>• OSSCAR(Simulation) assessment at 12-months for the OLIMPICS Trial; mean</li> </ul> |

value of three replicates, performed in the same manner as per the primary outcome measure.

- The number of live surgical procedures (SICS) will be recorded for twelve months between 0-months and 12-months.
- OLIMPICS Trial (SICS): Three further 'live' cataract (supervised) surgery procedures on patients at 12-months. These will be filmed (using a Zeiss OPMI operating microscope) and scored in the same masked manner using the SICS OSCAR.
- OLIMPICS Trial (SICS) – for a period of twelve months (for all SICS surgical procedures performed):
  - Day 1 Visual Acuity (un-corrected & best corrected) – LogMAR (equivalent)
  - Peri-operative Complications (posterior capsule rupture)

**Further Exploratory Analysis:**

- Surgeon confidence rating scores (Assessed at baseline, three and twelve months)

**Population**

The simulation surgical training will be conducted in Cape Town, South Africa. Trainees will have follow-up assessments in their home training institutions in the University of Nairobi, Kenya; Makerere University, Kampala, Uganda; MURHEC, Mbarara, Uganda; KCMC, Moshi, Tanzania; and University of Zimbabwe, Harare.

Patient cataract and trabeculectomy surgical outcome data will be collected by participants as per normal good clinical practice. This data will be summarised over 15 months, and a summary report sent to the PI with no personal patient identifiable information.

**Eligibility**

OLIMPICS Trial Inclusion criteria for trainee:

1. Trainee ophthalmologist in year one or two of MMed course of collaborating Institution
2. Agree to be randomly allocated to training 'Intervention' or 'Control' groups
3. Agree to, and sign agreement to not discuss, or share in any way, any of the details of the educational intervention for the first three months
4. Have performed zero complete SICS procedures
5. Have performed part of <10 SICS procedures
6. Agree to baseline assessment, assessment at three, twelve and fifteen months.
7. Agree to monitor, anonymise, and report all surgical outcomes of all patients operated during the one year period

OLIMPICS Trial Exclusion criteria:

1. Performed one or more complete SICS procedures, or parts of ten or more separate procedures

**Duration**

The anticipated overall project duration is about three years. The fieldwork will take about one and a half years.

285  
286  
287



289 **Study Outline Reference Diagram**  
 290

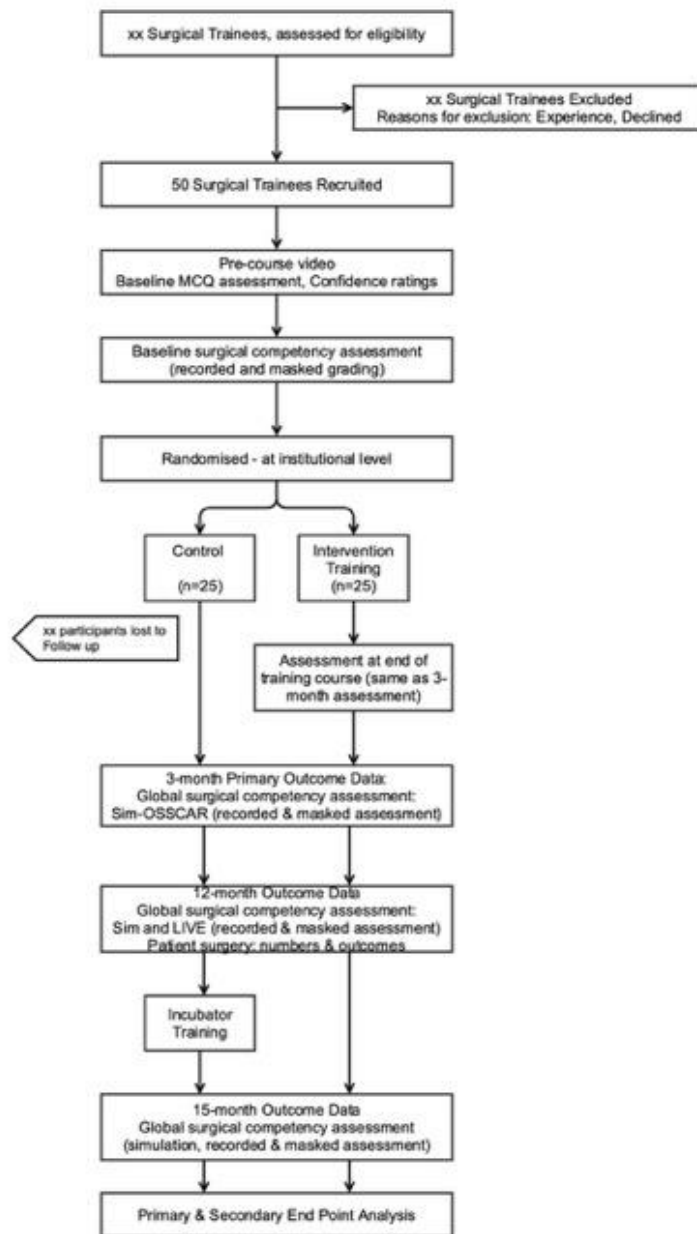

291  
 292  
 293  
 294

## Executive Summary

295  
296  
297  
298  
299  
300  
301  
302  
303  
304  
305  
306  
307  
308  
309  
310  
311  
312  
313  
314  
315  
316  
317  
318  
319  
320  
321  
322  
323  
324  
325  
326  
327  
328  
329  
330  
331  
332  
333  
334  
335  
336  
337  
338  
339

There is a huge need to perform high volumes of surgery in sub-Saharan Africa, to tackle the backlog of avoidable blindness. There is a great need to train many eye surgeons safely, efficiently, effectively, and to an acceptable level of competence. There is also a need to maintain and improve the quality and outcomes of surgery.

Currently, surgical training is often conducted using the traditional “apprentice model”, where a trainee observes a qualified surgeon and learns from them, and then the surgeon supervises the trainee performing surgery on a patient. We believe that this conventional model has substantial limitations and drawbacks, making surgical training less efficient and less safe.

We will test the hypothesis that intense modular simulation-based ophthalmic surgical education is superior to conventional training for the initial acquisition of competence.

Pilot studies have been conducted in Malawi, Uganda, and South Africa to develop, test and refine aspects of modular simulation-based ophthalmic surgical training in cataract and glaucoma surgery. Assessment tools have been developed and validated for use in this simulation-based training (see Appendices 3a and 3b). Subsequent to these pilot and validation studies, we are now able to test the efficacy of focussed modular simulation-based ophthalmic surgical training in two separate parallel-group randomised controlled trials.

We will conduct an RCT of intense simulation-based ophthalmic surgical education for training ophthalmologists in the procedures for cataract: the two leading cause of blindness in sub-Saharan Africa. Trainee eye surgeons will be randomised to the ‘intervention’ of focussed simulation-based surgical training (in addition to, and as an enhancement to conventional training), or to the ‘control’ group of current conventional training alone. The ‘control’ group participants will receive the same simulation training, only after a period of one year. Follow-up assessments will measure whether the trainees have gained in surgical competence (objectively assessed using a specific and validated grading score), knowledge, their perceived confidence as a surgeon, and in terms of the benefit to their patients (the quality and quantity of surgery performed).

All the training within the ‘educational intervention’ of this study will be performed using simulation. There is no testing or surgical training on patients within the study educational-intervention of both training trials. The only times when patients are indirectly involved is entirely as part of standard, regulated, and supervised clinical training within a Nationally accredited and registered ophthalmology training programme. When three anonymised and non-identifiable recordings of cataract surgical procedures are video-recorded (at twelve months), patients will be informed of the planned recording, and invited to sign a standardised informed consent as for any clinical image recording within standard clinical practice.

## 340 Background

341

### 342 The burden of cataract and glaucoma in sub-Saharan Africa

343 Globally there are an estimated 36 million people who are blind and a further 217 million with  
344 moderate or severe visual impairment.<sup>1</sup> Approximately 80% of blindness is preventable or treatable,  
345 and 90% of the burden is in Low and Middle Income Countries (LMIC). Sub-Saharan Africa (SSA) has  
346 the highest prevalence of blindness of any region at 9% in >50 year olds. Age-related cataract  
347 accounts for about half this blindness. Small incision cataract surgery (SICS) is a widely accepted,  
348 appropriate and affordable procedure with high quality visual outcomes.<sup>2-5</sup>

349

350 Together, cataract and glaucoma account for two-thirds of blindness in SSA, and both require  
351 surgical management. However, SSA is the region with the lowest number of ophthalmologists per  
352 capita, with about 2.6 per million, compared to 16.7 per million in Europe and the North America.<sup>6</sup>  
353 There is a striking mismatch between the burden of blinding disease and the availability of skilled  
354 staff to address it within SSA (Figure 1). The region urgently needs an increased number of proficient  
355 eye surgeons to counter avoidable blindness from cataract and glaucoma.<sup>7</sup>

356

357 **Figure 1:** Density equalised cartograms showing: (a) prevalence of blindness by WHO region, and (b)  
358 number of practicing ophthalmologists by country.<sup>8</sup>

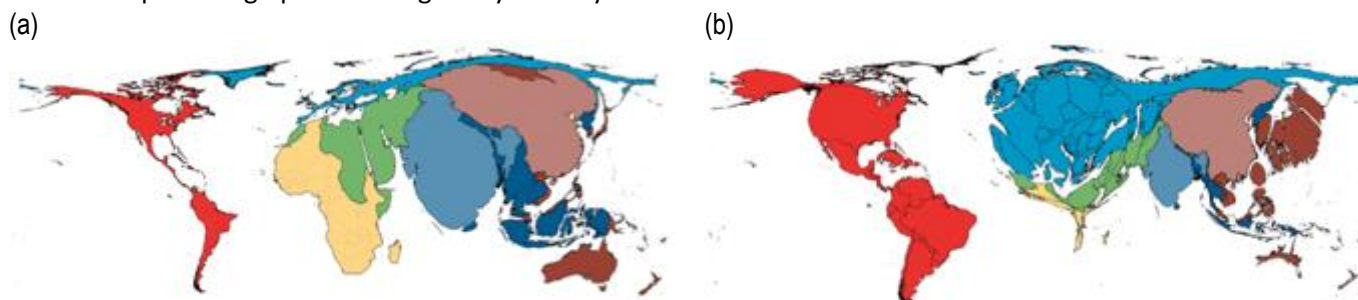

359

360

361 For example, the cataract backlog in SSA is approximately 15,000 operations per surgeon. Relatively  
362 few ophthalmologists perform trabeculectomy. There are around 500 people per ophthalmologist  
363 already blind from glaucoma, and the number with advanced glaucomatous disease who potentially  
364 warrant surgery is considerably more.

365

### 366 Surgical training in Sub-Saharan Africa

367 Of the more than two hundred thousand ophthalmologists in the world, only a very low proportion  
368 are trained and work in sub-Saharan Africa (SSA).<sup>9</sup> The shortage of ophthalmologists in SSA is well  
369 documented in the literature.<sup>10</sup> This leads to several challenges, including the amount of time that is  
370 available for training. There is a need to develop innovative, efficient, evidenced-based, and cost-  
371 effective strategies for ophthalmic training in the region, and globally.

372

373 A major review in 2015 by the International Agency for the Prevention of Blindness (IAPB) resulted in  
374 the publication of the IAPB Training Institutions Database. Within this there are listed ten  
375 ophthalmology training institutions in nine Francophone SSA countries, two in two Lusophone  
376 countries, and thirty-nine ophthalmology training programmes in ten different Anglophone African  
377 countries.<sup>11</sup> The total capacity of trainees within the ophthalmology training programmes in the  
378 College of Ophthalmology East Central and Southern Africa (COECSA) region was 64 (in total, for all  
379 years). However, this capacity does not necessarily equate to or reflect the numbers currently being  
380 trained, and the IAPB concludes that “more needs to be done to assess and address the strength of  
381 individual training institutions as well as understand why some institutions are regularly over-  
382 subscribed..”<sup>11</sup>

383

384 Within the COECSA region, the duration of training programmes varies from three years (in Kenya,  
385 and Uganda), to four years (in Ethiopia, Malawi, Tanzania, and Zambia). Ophthalmology training  
386 programmes in COECSA follow a competency-based curriculum. Trainees' timetables are often  
387 divided into 'semesters' of three to six months, where a particular domain of ophthalmology is  
388 focused upon. Training in cataract surgery generally starts towards the end of the first year, and  
389 training in glaucoma surgery (which is more complex), begins towards the end of the third year.  
390 Aside from the overall need in Africa to train greater numbers of proficient ophthalmologists, there  
391 are a limited number of consultant ophthalmologists / surgeon trainers within training institutions,  
392 with only limited time available for provision of training. With ever increasing demands on  
393 ophthalmology training programmes, most have reached capacity. There is a current pressing need  
394 to develop and validate new innovative approaches to deliver more effective, efficient and safer  
395 surgical ophthalmology training.

396

397 As a consequence of this shortage of trained ophthalmologists in SSA, a specific paramedical cadre  
398 has developed. 'Cataract surgeons' were originally described in 1987<sup>12</sup>, and over the past three  
399 decades training institutions and programmes have been established for ophthalmic clinical officers  
400 (OCO), or non-physician cataract surgeons (NPCS), in Malawi, Kenya and Tanzania. Currently  
401 seventeen countries in SSA employ NPCS, including Malawi and Uganda. However, two thirds of all  
402 the NPCS in SSA work in only three countries: Ethiopia, Kenya and Tanzania.<sup>13</sup> This current study will  
403 not include the cadre of OCO/NPCS, simply for the reason of standardisation; however this model of  
404 surgical training and the data from this study may provide great benefit to NPCSs in the future.

405

406 This study will include a systematic review of ophthalmology training in SSA. Data will also be  
407 collected for a focussed situational analysis and trainee survey of ophthalmic surgical training.

408

## 409 **Cataract Surgery**

410 The procedure of sutureless scleral-tunnel small-incision cataract surgery (SICS) is the most  
411 commonly performed cataract surgery procedure in SSA, and is the main standard of care. The  
412 technique uses a smaller wound compared to the older technique of sutured extra-capsular cataract  
413 extraction. There is less post-operative astigmatism, and fewer suture-related problems for SICS.  
414 The clinical outcomes of phacoemulsification cataract surgery and sutureless extra-capsular manual  
415 small-incision cataract surgery (SICS) are comparable.<sup>3 4 14 15</sup> SICS is an appropriate, safe, and  
416 affordable technique.

417

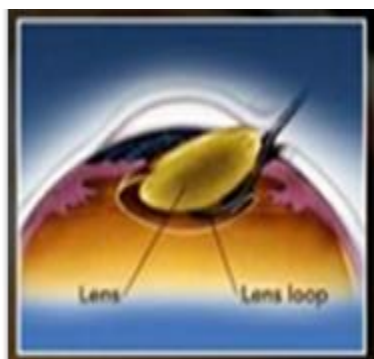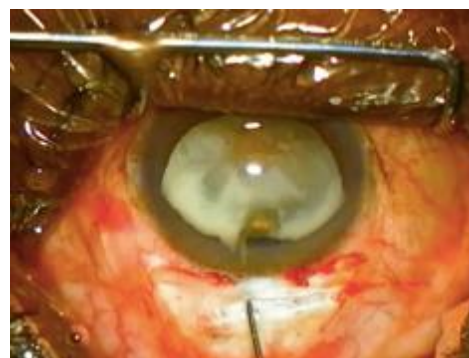

418

419 **Figure 2.** The cataract is removed in SICS.

420

421 The live surgical procedure can be viewed for small-incision cataract surgery on YouTube:  
422 <https://www.youtube.com/watch?v=LszyZqgR5v4>

423

424 The Iowa ophthalmology wet laboratory curriculum for teaching and assessing cataract surgical  
425 competency was described after a systematic review of literature and selection of best practices.<sup>16</sup>  
426 An interesting finding of this study was that several residency programmes had relied on the

427 outsourcing of cataract surgical training to “out-of-state or out-of-country institutions”. This  
428 suggestion may or may not be appropriate for ophthalmology training institutions SSA; however, as  
429 part of this study, we will be testing the utility of setting up simulation surgical training facilities.  
430 These may be within institutions, or perhaps available regionally for several training institutions. In  
431 the USA, as well as the UK, the use of surgical wet-labs / dry-labs is now standard. A few centres in  
432 SSA do use simulation wet/dry-labs for surgical training, although perhaps not in a structured way  
433 with trainees often being self-directed.

#### 434 Outcomes of Cataract Surgery

435 The primary outcome of cataract surgery is an improvement in visual acuity (VA). This can be  
436 measured without refractive correction (unaided), or with spectacle correction (best-corrected). It  
437 can be measured for distance (usually 6 metres) or near (usually 30cm). It is often very difficult,  
438 unrealistic, and expensive to measure post-operative visual acuity a few weeks after cataract surgery  
439 in rural LMIC settings due to the logistics of bringing the patient back to the hospital. Furthermore,  
440 there is evidence that day-one post-operative VA is a very good predictor of final VA.<sup>17</sup> It is critical  
441 for surgeons to collect and analyse their own cataract surgical outcomes, as there is clear evidence  
442 that such monitoring and personal reflection improves surgical quality and outcomes.<sup>18</sup> Tools for  
443 monitoring the outcomes of cataract surgery have been developed, and measurements included are:  
444 VA and complications.<sup>19</sup>

445

446 Complication rates vary for cataract surgery, depending on co-morbidity, the experience of the  
447 surgeon, the maturity of the cataract, and the technique used. Rates of complications (posterior  
448 capsule rupture (PCR) or vitreous loss (VL)) vary from 1.92% to 6%.<sup>14 15 20</sup> The WHO recommends to  
449 aim for a complication rate (PCR rate) of less than 5%.

450

#### 451 **Surgical Education and Simulation**

452

453 It is of course of benefit to patients, trainees and trainers that simulation in surgical training offers  
454 and enables an accessible, safe, and reproducible method of learning surgical skills and procedures  
455 outside of the stress of the operating theatre. However, despite these explicit and implicit benefits,  
456 and the great enthusiasm surrounding simulation in surgical and certainly ophthalmic surgical  
457 training, a question remains: are the skills obtained transferable to theatre? Simply put, does  
458 practicing eye surgery on a simulator only make a trainee better at operating on a simulator, or does  
459 it make the trainee better in the live-surgical setting too? This ‘predictive validity’, being the transfer  
460 of skills learnt in a simulation environment to live surgery, is challenging to measure.

461

462 A systematic review of sixteen randomized controlled trials of simulation of techniques used in  
463 laparoscopic procedures concluded that there was a ‘positive impact of simulation on operative time  
464 and predefined performance scores, however these alone are insufficient to demonstrate  
465 transferability of skills from the laboratory to the operating room’.<sup>21</sup>

466

467 A critical review of simulation-based medical education suggested twelve areas of best practices and  
468 features,<sup>22</sup> many of which have also been identified by other educational theorists as presented  
469 earlier. These twelve features and best practices included feedback, deliberate practice, curriculum  
470 integration, outcome measurement, simulation fidelity, skill acquisition and maintenance, mastery  
471 learning, transfer to practice, team training, high-stakes testing, instructor training, and educational  
472 and professional context. These twelve educational features are built into this current study.

473

474 Much of the initial literature of the utility of simulation in surgical training is in the medical domain  
475 of laparoscopic surgery.<sup>23 24</sup> This is important to emphasise, as the methodology used in these  
476 studies provides an excellent foundation for current and future ophthalmology simulation-based  
477 surgical education research.

478



479 There are several challenges in surgical training. As Prof Roger Kneebone explains, “demands for  
480 patient throughput are increasing, while reductions in work hours mean that trainees’ opportunities  
481 for hands-on experience have been curtailed”.<sup>25</sup> These challenges are global, and in Sub-Saharan  
482 Africa the demand for patient throughput is enormous for all healthcare professionals: trainees and  
483 trainers alike. Kneebone continues to argue that if “adequate experience can no longer be gained  
484 wholly through operating, effective adjuncts must be found. Simulation offers an environment in  
485 which learners can train until they reach specified levels of competency”.

486  
487 In a review paper on the features of medical simulators, it was illustrated that high-fidelity medical  
488 simulators facilitate learning in the right conditions. These include repetitive practice, providing  
489 feedback, curriculum integration, having a range of difficulty level, and having multiple learning  
490 strategies. The importance of individualized learning; where trainees have reproducible,  
491 standardized educational experiences and are active participants and not merely passive bystanders,  
492 was also highlighted.<sup>26</sup>

493  
494 Intensive simulation-based surgical education has been shown to rapidly increase surgical skills,  
495 decrease complication rates, provide a safe and relaxed environment to learn in, and enable  
496 sustained deliberate practice,<sup>26</sup> however this has not yet been comprehensively proven for  
497 ophthalmic surgical training.<sup>27</sup>

498

## 499 **Simulation in Ophthalmic Surgical Training**

500

501 The College of Ophthalmology of Eastern Central and Southern Africa (COECSA) has adopted a  
502 competency-based curriculum for ophthalmic trainees in the region. There are several learning  
503 domains, one of which is surgical skills. Of the seventeen separate surgical skills to be learnt, the  
504 very first is for ‘Simulation and Wetlab’.<sup>28</sup> This illustrates the importance placed within COECSA on  
505 the use of simulation in surgical training. It has been acknowledged however that this curriculum-  
506 integration is only in its infancy, as with many ophthalmology training programmes around the  
507 world. There is no coherent, sustainable, standardised and educationally-underpinned regional  
508 training programme employing simulation. Furthermore, there is no robust evidence or significant  
509 data testing the efficacy of simulation-based surgical education in cataract and glaucoma surgery.

510

511 As for most other surgical specialities, the use of simulation is a relatively recent addition to surgical  
512 education. In ophthalmology, as with other medical specialities, there has been a focus and  
513 fascination on attractive and highly sophisticated technology models of simulation training.<sup>29</sup> There  
514 is an argument to be made that high-tech does not always imply high-fidelity simulation. Certain  
515 aspects of a procedure are almost impossible to simulate using computer simulation models. Low-  
516 tech models of ophthalmic simulated surgical training have been used for decades, and recent  
517 developments include the use of artificial eyes.

518

519 A difficult and yet crucial aspect of simulation in surgical education has been identified is the  
520 predictive validity: the transfer of simulated skill to clinical practice in the operating theatre.  
521 However, it has been consistently demonstrated that skills acquired on simulators do transfer to the  
522 operating room, and proficiency-based training maximises this benefit.<sup>30</sup> Although there is some  
523 evidence, and it is implicitly accepted, more and robust educational research is needed to explicitly  
524 prove the predictive validity of simulation in ophthalmic surgical education.

525

## 526 **Artificial Eyes**

527

528 Artificial eyes made from plastic and other synthetic materials have been used and developed over  
529 the past decade for ophthalmic simulated training. In the UK, Phillips Studio in Bristol have

530 developed artificial eyes for use in training in a number of ophthalmic surgical procedures, including  
531 SICS and trabeculectomy.<sup>31</sup>

532

533 **Figure 4:** The artificial eyes that were used in the surgical training programmes in Malawi and  
534 Uganda, as part of the pilot studies ahead of this current project.

535

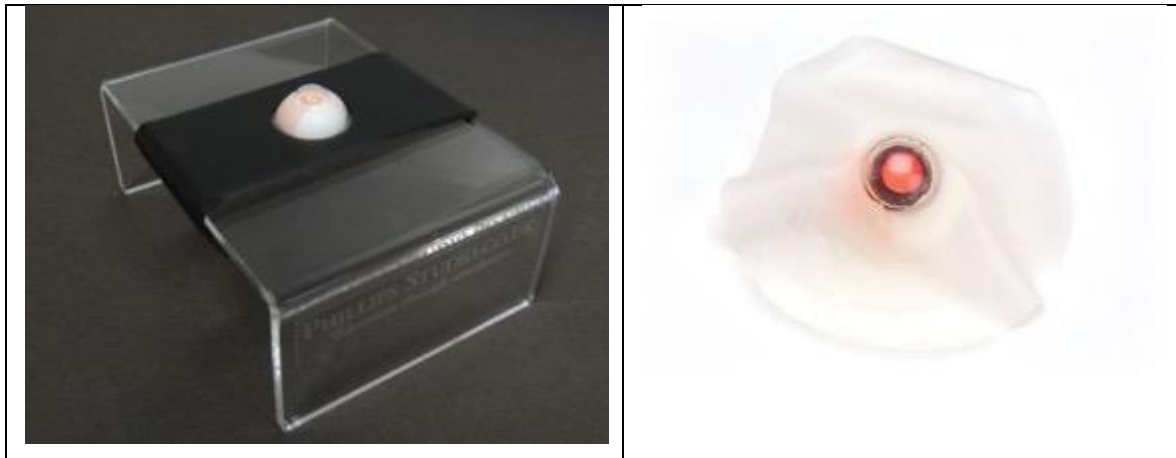

536

[www.phillipsstudio.co.uk](http://www.phillipsstudio.co.uk)

537

538 'Kitaro DryLab' is a tool to teach and learn some steps of cataract surgery, including the  
539 capsulorrhexis and sclero-corneal tunnel construction of SICS. It is mobile, and can be used on a  
540 desktop, and without the use of an operating microscope (Frontier Vision Co. Ltd., Hyogo, Japan).

541

#### 542 *Computerised simulators or virtual-reality models.*

543

544 The use of computerized simulation models have been validated for cataract<sup>32-34</sup> and retinal  
545 surgery.<sup>35</sup> Three computerised simulators have been used for cataract surgical training in  
546 ophthalmology: the Eyesi (VRMagic Holding AG, Mannheim, Germany), MicroVisTouch  
547 (ImmersiveTouch, Chicago, USA), and PhacoVision (Melerit Medical, Linkoping, Sweden).<sup>36</sup>

548

549 A simulation-based performance test and certification for cataract surgery has been established for  
550 use with the Eyesi simulator. The test showed evidence of validity, and appeared to be a useful and  
551 reliable assessment tool, both for cataract procedure-specific as well as general micro-surgical  
552 skills.<sup>37</sup> Other assessment tools used in ophthalmic surgical education will be discussed in the next  
553 section.

554

555 HelpMeSee (New York, USA) are in the final stages of developing a full-immersion surgical training  
556 simulator for the use within high capacity surgical education programmes for small-incision cataract  
557 surgery.<sup>38</sup>

558

559 The OLIMPICS Trial focuses on the utility of low-cost, high-fidelity simulation within a bespoke  
560 educational package of curriculum, assessment, practice, and feedback.

561

#### 562 **Assessment tools in ophthalmic surgical training.**

563

564 Equally, if not more important than the selection of substitutes in the development of a simulation  
565 training curriculum for ophthalmic surgical training, is the choice of the right assessment tool to  
566 evaluate the fidelity, reliability and validity of the training approach.

567

568 As post-graduate surgical education has changed over the past decade to a competency-based  
569 model, surgical training programmes have been directed by the Royal Colleges and General Medical  
570 Council (GMC) in the UK, Surgical Colleges in Africa, and the Accreditation Council for Graduate  
571 Medical Education (ACGME) in the US, to provide evidence of the attainment of competence by  
572 trainees.

573

574 For this, training institutions and programmes need valid competency assessment tools. Several such  
575 tools have been developed for surgical training in the field of ophthalmology. Validation of the use  
576 of artificial eyes and associated training assessment tools are important, to determine their use as  
577 an objective and reliable training and assessment of surgical competence in ophthalmic surgical  
578 training. Much of the work on validation of simulation competency assessment tools related to this  
579 study, have been completed in pilot studies conducted by Will Dean and several of the co-applicants  
580 in Uganda, Malawi and South Africa over the past two years.

581

582 Ophthalmic surgery competency assessment tools include the OSACSS (objective structured  
583 assessment of cataract surgical skill), developed as an objective performance-rating tool for  
584 phacoemulsification cataract surgery.<sup>39</sup> The ESSAT (eye surgical skills assessment test) is a three-  
585 station wet laboratory surgical skills assessment course was developed for ophthalmic trainees in  
586 the USA.<sup>40 41</sup> The OASIS (objective assessment of skills in intra-ocular surgery) was developed in  
587 Harvard, Boston in 2005.<sup>42</sup> The aim was to develop an objective ophthalmic surgical evaluation  
588 protocol to assess surgical competency and improve outcomes – developed specifically for  
589 phacoemulsification cataract. The main purpose of OASIS is the direct observation of live surgery,  
590 and surgical assessment.

591

592 *OSCAR (ophthalmology surgical competency assessment rubric) origins*

593

594 An assessment matrix (Ophthalmology surgical competency assessment rubric – OSCAR) for “live”  
595 ocular surgery (i.e. on patients) has been developed and validated by the International Council of  
596 Ophthalmology (ICO).<sup>43</sup> These OSCARs (Appendices 3c and 3d) were originally based on the OSACSS,  
597 however expanded by creating a set of behaviourally-anchored scoring matrices that precisely and  
598 explicitly define what is expected for each step. The rubric was based on a modified Dreyfus scale  
599 (novice, beginner, competent),<sup>44</sup> as trainees were not expected to become experts during training.

600

601 For the purpose of this research project, this template was selected and re-designed an ophthalmic  
602 simulated surgical competency assessment rubric (OSSCAR(simulation)) for two of surgical  
603 techniques on artificial eyes (Appendices 3a and 3 b).

604

## 605 **Existing Simulation-Based Surgical Training and Assessment in Ophthalmology:** 606 **Validity and Research**

607

608 In a major systematic review, a team from Denmark screened over a thousand papers, and studied  
609 one hundred and eighteen trials involving simulation-based training or assessment of ophthalmic  
610 surgical skills among health professionals.<sup>27</sup> They correctly state that “using simulation models  
611 without knowledge of reliability, validity and efficacy may compromise patient safety, especially if  
612 the trained skills do not correlate with the skills needed for real-life performance”. Through the use  
613 of state-of-the art frameworks for assessing the quality of trials, including a modern unified  
614 framework consisting of five sources of validity and a four-level assessment of the efficacy of  
615 simulation training programmes; they found the overall evidence for the use of simulation-based

616 training or assessment in ophthalmology to be poor. Only two of the trials investigated transfer of  
 617 skills into the operating theatre, and only four evaluated the effect of simulation-based training on  
 618 patient-related outcomes. A lot more, and more rigorous, educational research investigating the  
 619 validity, reliability and efficacy of simulation-based ophthalmic surgical training is needed.  
 620  
 621

622 **Ophthalmology Simulation-Based Surgical Training Pilots in SICS and Glaucoma**  
 623 **Surgery: Development of the OLIMPICS Study and GLASS Trial Interventions**  
 624

625 Over the past three years, we have conducted six separate pilot training courses in Uganda, Malawi,  
 626 and South Africa. As part of these, two-day to one week modular simulation-based training courses  
 627 and curricula were designed and conducted. Participants were trained using different modalities,  
 628 and various simulation techniques, including artificial eyes. The courses in Malawi and South Africa  
 629 were for cataract surgery, and the courses in Uganda for trabeculectomy.  
 630

631 **Development of the Training Curriculum**  
 632

633 Pilot training course timetables and curriculum aimed to be a comprehensive intense training in  
 634 either SICS (Malawi and South Africa pilots), or trabeculectomy (Uganda pilots). Specific elements of  
 635 the courses included: basic sciences, epidemiology, surgical procedure and complications, numerous  
 636 practical simulation surgical training tasks, public health screening, and clinical governance of  
 637 monitoring outcomes of surgery. Feedback was obtained and recorded during group discussions,  
 638 semi-structured interviews (which were recorded, transcribed and thematised), and formal  
 639 feedback.  
 640

641 There were 29 participants in the six pilot courses. All aspects of the training courses scored either 4  
 642 or 5 out of five in feedback evaluation, except for one trainee scoring 3/5 for ‘experience of using  
 643 model eyes’ in Uganda and one trainee scoring 3/5 for ‘basic sciences’ in South Africa.  
 644

645 Qualitative analysis of the semi-structured interviews revealed five themes that trainees valued with  
 646 respect to simulation-based surgical education. These were patient safety, practical skills, ease &  
 647 efficiency, transference to theatre, and the building of confidence.  
 648

649 This work has led up to this current protocol, and the current detailed and robust randomised  
 650 controlled trials. The curriculum piloted in Malawi, South Africa, and Uganda has been refined into  
 651 the detailed timetable/curriculum as follows (see also the training programme timetables on pages  
 652 30 and 31):  
 653

654 **Table 1: Training Course Curriculum & Objectives**

|                   |                                                                                                                                                                                                                                                                                                                                                                                 |
|-------------------|---------------------------------------------------------------------------------------------------------------------------------------------------------------------------------------------------------------------------------------------------------------------------------------------------------------------------------------------------------------------------------|
| Pre-Course        | <ul style="list-style-type: none"> <li>• Formal baseline multiple-choice test of knowledge of basic and clinical sciences</li> <li>• Video of procedure (SICS or Trabeculectomy)</li> <li>• On-line basic and clinical sciences lectures (anatomy, physiology, epidemiology, surgery)</li> </ul>                                                                                |
| Course Curriculum | <ul style="list-style-type: none"> <li>• Video of procedure (SICS or Trabeculectomy)</li> <li>• Epidemiology &amp; Burden of Disease</li> <li>• Basic microsurgical skills (suturing)</li> <li>• Learning theory</li> <li>• Learning &amp; Assessment tools</li> <li>• Screening and pre-operative assessment</li> <li>• Surgical procedure specifics &amp; practice</li> </ul> |

|             |                                                                                                                                                                                                                                                                                                                                                                                                                                                                                                                                                                      |
|-------------|----------------------------------------------------------------------------------------------------------------------------------------------------------------------------------------------------------------------------------------------------------------------------------------------------------------------------------------------------------------------------------------------------------------------------------------------------------------------------------------------------------------------------------------------------------------------|
|             | <ul style="list-style-type: none"> <li>• Complications and how to manage them</li> <li>• Post-operative care and monitoring (audit) of outcomes</li> </ul>                                                                                                                                                                                                                                                                                                                                                                                                           |
| Post-Course | <ul style="list-style-type: none"> <li>• Individualised plan for sustained-deliberate-practice, including:</li> <li>• Weekly practice of simple simulation techniques.</li> <li>• Once monthly practice of SOS on artificial eyes with recording of procedure, compression of video file, and encrypted CyberSight upload for evaluation and feedback (email monthly, and a phone/Skype call at one and two months)</li> <li>• Provision of a basic set of surgical instruments, 4 artificial eyes &amp; 1 mount, consumables (blades, needles, syringes)</li> </ul> |

655  
656  
657

### 658 **Economics of Surgical Education**

659

660 A review of surgical training in the COSECSA (College of Surgeons of Eastern Central & Southern  
661 Africa) region in 2011 showed a range of costs for tuition per trainee per annum from US\$1,800 to  
662 \$11,500.<sup>45</sup> There are direct costs of tuition fees, as well as indirect costs of extra time taken in  
663 theatre or clinics. These extra direct and indirect costs make it challenging to make an accurate  
664 determination of total costs. Furthermore, tuition fees and living expenses change over time. In  
665 2015 the International Agency for the Prevention of Blindness (IAPB) estimated the total mean cost  
666 (fees and living costs) for training an Ophthalmologist in Africa is US\$43,484; with an extra \$28,000  
667 needed for basic equipment to make the new graduate productive.<sup>11</sup>

668

669 There are several different indicators for the health economics of training and education. These will  
670 be explored in the context of cataract and glaucoma surgery in SSA.

671

672 Cost is an issue with simulation training in ophthalmology. An analysis in the USA showed cost-  
673 reductions and savings of tens of thousands of US Dollars' for residency training programmes using  
674 ophthalmic surgical simulators<sup>46</sup>. However, the initial capital expenditure of these high-tech  
675 computerised simulators may be prohibitive, especially for smaller training programmes.

676

677 In this current study, we will be focusing on the use of bespoke high-fidelity, low-tech yet affordable  
678 and sustainable models of ophthalmic simulation-based surgical education (see Figure 5).

679

680 **Figure 5.** Pilot ophthalmic simulation-based surgical training courses in Malawi & Uganda

681

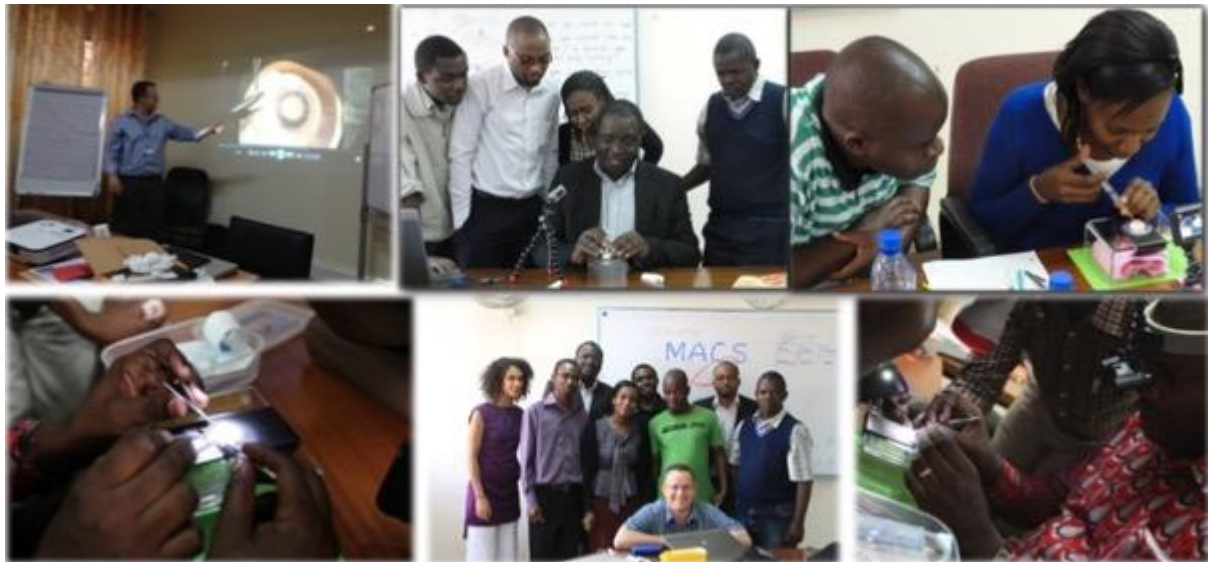

682  
683  
684  
685  
686  
687  
688

Costs of the study intervention (intense simulation-based surgical training) will be assessed in terms of capital costs, instruments, consumables, educational materials, time (faculty time, and trainees' time away from work), and incidental costs (local transport, accommodation etc.). This will be added to a more detailed incremental cost effectiveness analysis.

## Rationale

There is a huge need for eye surgery. In Sub-Saharan Africa alone, there are an estimated 4,8 million people who are bilaterally blind, and an estimated 21.4 million who are visually impaired. About 80% of this blindness and visual impairment is avoidable. The ratio of eye surgeons to population in SSA is 2.6 per million.<sup>6</sup> If there was a goal to treat all the cataract eyes in people who are blind or vision impaired, then each ophthalmologist would have a personal backlog of an average of 15,000 cataract surgeries to perform. Glaucoma may be treated by surgery as a first line of management, rather than topical medications (eye drops). If this were the case, then each ophthalmologist would have a backlog of well over 500 surgical trabeculectomies to perform.

There is a huge need to train eye surgeons. Training opportunities and the number of trainers are limited. Trainers' time is limited. Surgical training needs to be accelerated, be more efficient, and be made safer.

In parts of the world, eye surgeons may be emerging from programmes not necessarily fully trained. A recent survey of ophthalmology training programmes in the USA illustrated that in final year residents, that 71.4% had performed <100 cataract surgeries, and 88.6% had performed <10 trabeculectomies.<sup>47</sup> A survey of ophthalmology residents in China showed that the median number of cataract surgeries performed was zero.<sup>48</sup>

Simulation-based surgical education has been shown to rapidly increase the rate of learning of surgical skills, decrease complication rates, and provide a safe and calm environment to learn in.<sup>26</sup> however this has not yet been robustly tested or proven for ophthalmology surgical training.<sup>27</sup>

As previously described, pilot training courses using intense simulation training for trabeculectomy and SICS have recently been conducted in Mbarara (Uganda), Blantyre (Malawi), and Cape Town (South Africa) by the Principal Investigator and local Heads of Departments (see Figure 5). This involved specially designed modular curricula with repeated simulated practice of the components of procedures on artificial eyes and other "models". Performance was assessed using 'ophthalmic simulated surgical competency assessment rubrics' (OSSCARs). Feedback from trainees was very positive in terms of competence, perceived benefits of focused simulation-based training and the enabling of deliberate practice.

The scope of this PhD study lies within a much broader context. The ultimate goal is to reduce the prevalence of avoidable blindness. One important aspect of this goal is human resource development, within which lies the education and training of eye surgeons. This PhD is aimed specifically at testing the efficacy of the intervention of simulation-based surgical education as an enhancement to conventional training.

731 **Objectives**

732  
733

734 **Overall Objective**

735

736 The hypothesis this study will test is that enhanced modular simulation-based ophthalmic surgical  
737 education together with conventional training, is superior to standard conventional training alone,  
738 for the acquisition of competence.

739

740 The overall purpose of this research is to develop the evidence base to guide enhanced, high-quality  
741 skills development in ophthalmic surgical training in SSA which could then be scaled-up to include  
742 other regions. The evidence-base could subsequently be used to inform the planning and  
743 implementations of ophthalmology surgical training programmes globally. The main question for  
744 both trials is whether adding simulation-based surgical training to conventional training results in  
745 improved acquisition of high-quality skills. The outcomes will include measures of surgical  
746 competence, surgical quality, confidence and knowledge.

747

748 **Specific Objectives**

749

- 750 1. To conduct the OLIMPICS Trial: a randomised controlled trial for SICS; whether simulation-  
751 based surgical incubator training leads to improved acquisition of high-quality surgical skills,  
752 with objectively assessed competence, confidence, knowledge, and surgery-specific  
753 outcomes and surgical numbers.

754

755

756

757



## 758 **Methodology**

759

### 760 **Design Summary**

761 This research programme will involve a randomised controlled single-masked, parallel-group,  
762 'educational-intervention' trials:

- 763 • OLIMPICS Trial; Small Incision Cataract Surgery (SICS)

764 The trial will have two arms: (a) 'simulation-based educational intervention' and (B) 'standard'  
765 control training. They will be randomised to one of the two arms. Surgical competency will be  
766 assessed at baseline, 3-months, 12-months and 15-months. The primary outcome will be the 12-  
767 month simulation score.

768

### 769 **Study Setting**

770 This is a multi-centre and multi-country study. We will enrol trainee ophthalmologists (doctors who  
771 have graduated from medical school, and are currently undergoing specialist training) from six  
772 ophthalmology training programme institutions in East and Southern Africa: Nairobi, Kenya; Moshi,  
773 Tanzania; and Kampala and Mbarara, Uganda; and Harare, Zimbabwe. The simulation-based  
774 'incubator' training will be conducted at the Surgery Training Unit, Community Eye Health Institute  
775 (CEHI), University of Cape Town, South Africa.

776

### 777 **Study Duration**

778 The training will be conducted during late 2017, 2018, and 2019. Follow-up of the participants'  
779 surgical outcomes and output is expected to be completed by the end of 2019.

780

### 781 **Study Participants**

782 Current trainees (between October of 2017 and December 2018) in all five training institutions will  
783 be selected according to the inclusion and exclusion criteria, and randomised. Participants will be  
784 recruited from ophthalmology training programmes in Nairobi (Kenya), Moshi (Tanzania), Makerere  
785 (Uganda), Mbarara (Uganda), and Harare (Zimbabwe) during visits by the PI.

786

### 787 **Inclusion / Exclusion Criteria**

788 OLIMPICS Trial (SICS):

789 Inclusion Criteria

- 790 • Zero complete SICS procedure performed
- 791 • Parts of less than ten separate SICS procedures performed
- 792 • Trainee ophthalmologist in year one or two of MMed course of collaborating Institution.
- 793 • Agree to be randomly allocated to 'Intervention' or 'Control' training groups
- 794 • Agree to, and sign agreement not discuss, or share in any way, any of the details of the  
795 educational intervention for the first three months
- 796 • Agree to baseline assessment, assessment at three, twelve and fifteen months; Agree to  
797 monitor, anonymise, and report all surgical outcomes of all patients operated during the  
798 fifteen-month period (month 0 to 12)
- 799 • Good English language skills

800 Exclusion Criteria

- 801 • One or more complete SICS procedures performed

- 802
- Performed parts of ten or more separate SICS procedures

803

804

### 805 **Informed Consent**

806 Potential participant trainees will be informed of the training opportunity and the study. Heads of  
807 Department will be involved in the process and are co-applicants to this study submission.

808

809 Trainee participants will be informed in detail about the nature of the education-intervention study;  
810 that the training offered in the 'intervention' arm offers no official qualification and will not be  
811 recorded in their national training evaluation; that trainees in the 'control' arm will be offered  
812 exactly the same simulation-based education opportunity in Cape Town after an initial study period  
813 of one year. All surgeons participating will be free to leave the study at any time. See Appendices 1a  
814 to 1d for detailed Information and Consent Forms.

815

816 Permission will be sought from the Head of Department for trainees to be enrolled, and take time  
817 away from work duties to be involved in the training. Further ethical considerations are discussed in  
818 detail on page 40.

819

### 820 **Withdrawal Criteria**

821 Trainee participants, in either the 'intervention' or 'control' groups are free to leave the study at any  
822 time. If this is the case for any participant, no effort will be made to recover any costs incurred or  
823 equipment provided. Data collected up to the point of withdrawal of consent will have been  
824 anonymised and securely stored, and will still be held and included in data analysis. If participant  
825 withdrawal rates impact the sample size needed in either study, then a reserve training institution  
826 will be recruited.

827

828

829 **Pre-randomisation baseline assessment**

830 Following consent, participant trainees will be evaluated in-country. This will include evaluation of  
831 previous surgical experience, and introduction to the ICO OSCAR.<sup>49</sup> They will then be assessed using  
832 the baseline simulation OSSCAR (see Appendices 3a and 3b); this will involve three simulation  
833 procedures (these will be recorded, anonymised, and remotely assessed using the OSSCAR). This  
834 provides the baseline score for all participants: intervention and control. A standardised quiz/test  
835 will also be administered: 30 multiple choice questions on basic sciences, and the basic diagnosis  
836 and surgical management of either glaucoma or cataract.  
837

838 **Randomisation**

839 Sequence generation

840 The randomisation sequences will be computer generated and administered centrally by a  
841 statistician based at the LSHTM who is independent of all other aspects of the trial. We will use block  
842 randomisation (block size 2 or 4), with a separate sequence for each recruitment site, to ensure  
843 balance. The statistician will generate the code / sequence (as a block of 2 or 4).  
844  
845

846 Allocation Concealment

847 The statistician will not have access to information about subsequent allocation, and the individual  
848 potential participants. The PI, co-investigators, and participants will have no prior access to the  
849 random sequence.  
850  
851

852 Randomisation Implementation

853 Trainees within the same training institution, who have met the appropriate inclusion and exclusion  
854 criteria for the OLIMPICS Trial (as detailed above), will be eligible for randomisation to the  
855 ‘intervention’ or ‘control’ arm. Each group of four trainee participants will be agreed by the Training  
856 Programme Director / Head of Department.  
857

858 For example:

859  
860 A block of four potential participants are identified in Uganda for the OLIMPICS trial. These are the  
861 7<sup>th</sup>, 8<sup>th</sup>, 9<sup>th</sup>, and 10<sup>th</sup> participants in the trial overall. The statistician will be asked to randomly  
862 allocate participants using a randomly generated code for a block of four. Physically, in Uganda, the  
863 numbers 7, 8, 9, and 10 will be printed on cards and placed in a bag. Participants will be invited to  
864 pick one number from the bag. The randomisation sequence from the statistician will then be  
865 electronically unveiled: for example:  
866

|             |              |
|-------------|--------------|
| OLIMPICS 7  | Control      |
| OLIMPICS 8  | Intervention |
| OLIMPICS 9  | Intervention |
| OLIMPICS 10 | Control      |

867  
868  
869

870 **Trial Arms**

871 A) Simulation-based training “intervention” arm:

872 The participants randomised to ‘intervention’ arms of the two trials will be invited to Cape Town for  
873 the six-day intense simulation-based educational intervention course.

874

875 **Phase 1:**

876 We will provide a safe, focused, appropriate, educationally-validated and already piloted intense six-  
877 day residential training programme based at the Surgical Training Unit at the University of Cape  
878 Town (UCT) in South Africa. The detail of the course timetable is shown on pages 30 and 31. The  
879 course will be a blended curriculum: incorporating online and in-person elements; small group  
880 teaching, varied individual practical sessions, videos and lectures. There will be focus on  
881 epidemiology and the burden of disease, the challenges of screening, and the indications for surgery.  
882 Each component of this course has been educationally validated by a panel of cataract and glaucoma  
883 experts, which rated and scored the course content, coverage, adequacy and quality.

884

885 The procedures of trabeculectomy, and in the separate course SICS, will be “deconstructed” and  
886 each step explained in detail with the aid of video and simulation demonstration. The separate steps  
887 will be repeatedly practiced under simulated conditions. We will use both low cost / moderate  
888 fidelity materials (e.g. foam for suturing, fruit for scleral tunnel/flap construction etc.) and higher  
889 cost / high fidelity model eyes which are mounted under a head manikin.  
890 [www.simulatedocularsurgery.com]. Further presentations, small group discussions, and practical  
891 presentations will be conducted on potential surgical complications and their management.  
892 Individual guided exercises and discussions on audit/monitoring of outcomes will be held and  
893 evaluated.

894

895 **Phase 2:**

896 A three-month period of sustained deliberate practice of surgical skills using the simulated surgery  
897 system and ongoing monthly remote feedback/mentorship, in addition to the standard conventional  
898 training practice available in the institution. Specifically, ‘intervention arm’ trainees will be provided  
899 with surgical instruments, artificial eyes, Sim-OSSCARs (simulation) and individual plans of simulation  
900 practice, as well as an iPad mini recording device (Apple, CA, USA) installed with video compressor  
901 App (Fbm Developments, Hong Kong). Monthly remote evaluations (via compressed video file over  
902 the internet) will be conducted, and appropriate feedback given. In summary, the ‘educational  
903 intervention’ / training will involve pre-course teaching, a five-day intense course in Cape Town, and  
904 a period of 12 weeks of sustained-deliberate practice.

905

906 The final visit in the local hospital at three months will be for the Sim-OSSCAR assessment  
907 (secondary outcome measure). Specifically this is a video recording of three separate simulation  
908 surgical procedures which are then anonymised, and marked using the Sim-OSSCAR in a masked  
909 assessment by two independent surgeon experts. The repeated measures analysis of the three Sim-  
910 OSSCAR scores will be a secondary end-point measure.

911

912

913

914 Table 2: OLIMPICS Trial (SICS) Training Programme

915  
916  
917  
918  
919  
920  
921  
922  
923  
924  
925  
926

Pre-course online modules:

- SICS video
- Anatomy & physiology
- OSCAR & Sim-OSCAR

Pre-course administration:

- Informed consent for participation
- Study of outcome measurements

| Day              | Morning<br>8:00 – 10:30                                                                                 | Midday<br>11:00 – 1:00                                                                               | Afternoon<br>2:00 – 5:00                                                              | Evening<br>(Homework)                           |
|------------------|---------------------------------------------------------------------------------------------------------|------------------------------------------------------------------------------------------------------|---------------------------------------------------------------------------------------|-------------------------------------------------|
| <b>Sunday</b>    | <i>Candidates arrive in Cape Town</i>                                                                   |                                                                                                      |                                                                                       | Free                                            |
| <b>Monday</b>    | Burden of disease.<br>Suturing.                                                                         | SICS Video.<br>Learning theory &<br>expertise.<br>OSSCAR.                                            | Suturing.<br>Review.                                                                  | <i>SICS Video.<br/>Suturing.</i>                |
| <b>Tuesday</b>   | Review.<br>Scleral Tunnel.<br>OSSCAR.<br>Demonstration of<br>SICS SOS.                                  | Pre-operative<br>assessment.<br>Capsulotomy.                                                         | Review.<br>Complications.<br>Management of<br>complications SOS.                      | <i>Tunnel.<br/>Capsulotomy.</i>                 |
| <b>Wednesday</b> | Review.<br>Post-operative<br>care/Audit (outcome<br>monitoring).<br>Endophthalmitis:<br>protocol & SOS. | OSSCAR.<br>Demonstration of<br>SOS.<br>SICS SOS practical:<br>nucleus extraction &<br>IOL placement. | SICS SOS.<br>Teamwork & flow in<br>theatre.<br>Anterior vitrectomy<br>SOS.<br>Review. | <i>SICS Video.<br/>What to cover<br/>again.</i> |
| <b>Thursday</b>  | Review.<br>SICS SOS.<br>What to cover again.                                                            | In-depth interviews.<br>SICS SOS.                                                                    | Suturing.<br>Scleral Tunnel.<br>Capsulotomy.                                          | <i>SICS SOS.</i>                                |
| <b>Friday</b>    | Review.<br>OSSCAR/OSCAR.                                                                                | SICS SOS.                                                                                            | Planning forward:<br>SDP and Individual<br>Training Plans.                            |                                                 |
| <b>Saturday</b>  | <i>Candidates depart Cape Town</i>                                                                      |                                                                                                      |                                                                                       |                                                 |

927  
928  
929  
930  
931

932 B) Standard conventional training “control” arm:  
933 Controls will be offered the same training in Cape Town after a period of one year. Both the  
934 ‘intervention’ and ‘control’ arms will continue to undergo conventional post-graduate  
935 ophthalmology training. This typically includes a mixed timetable of out-patient clinics, surgical  
936 operating lists (observing or assisting a senior surgeon), and teaching or research sessions. The  
937 frequency and nature of these timetables will be collected for all participants.

938  
939  
940

## 941 Outcomes

942

943 In the OLIMPICS Trial, participants will be assessed on three occasions after recruitment (in addition  
944 to baseline): 3-months, 12-months, and 15-months (3 months after the control group receive the  
945 intense simulator training). On the baseline assessment, simulation SICS procedures will be recorded  
946 (with masked assessment using the OSSCAR(simulation)). At 3-months, 12-months and 15-months,  
947 supervised live surgical SICS procedures will be recorded and marked (remote and masked  
948 assessment using the OSCAR).

949

950 Primary Outcome – OLIMPICS Trial

951 ***The primary outcome measure of the OLIMPICS Trial will be the procedure specific repeated***  
952 ***measures analysis of Sim-OSSCAR score performed three times at 12-months.*** The analysis of the  
953 primary outcome measure will be based on the differences in the Sim-OSSCAR scores by arm. This  
954 score is derived from an assessment matrix or rubric of procedure specific and general microsurgical  
955 skill indices (see Appendix 3a). Each item in the matrix is graded on a modified Dreyfus score (novice,  
956 advanced beginner, and competent). The total possible score is 40 points.

957

958 This live surgery assessment will be recorded using a standard microscope and recording device  
959 (Zeiss OPMI operating microscope; Zeiss, Oberkochen, Germany), with all participants wearing  
960 similar blue latex-free surgical gloves. Recordings will be given an anonymous number to give no  
961 indication as to in which arm the surgeon is. Assessments of the surgical video will be conducted  
962 separately by two masked observers, watching the recorded surgery performed by the trainee at a  
963 separate time and place. Both observers are experienced eye surgeons and surgical trainers. Intra-  
964 and Inter-observer reliability studies will be conducted.

965

966

967 Secondary Outcomes:

- 968 1. Sim-OSSCAR(Simulation) assessments on the final day of the intervention training course, for the  
969 OLIMPICS Trial; mean value of three replicates, performed in the same manner as per the  
970 primary outcome measure.
- 971 2. Sim-OSSCAR(Simulation) assessments at 12-months; mean value of three replicates, performed  
972 in the same manner as per the primary outcome measure.
- 973 3. Live SICS surgery ICO-OSCAR assessment at 12-months; mean value of three replicates,  
974 performed in the same manner as per the primary outcome measure.
- 975 4. The number of surgical procedures (SICS) will be recorded for twelve months between 0-months  
976 and 12-months.
- 977 5. OLIMPICS Trial (SICS) – for a period of fifteen months (for all SICS surgical procedures  
978 performed):
  - 979 • Day 1 Visual Acuity (un-corrected & best corrected) – LogMAR (equivalent)
  - 980 • Peri-operative Complications (Posterior capsule rupture)

981

982 Gathering and recording of surgical outcome data is part of normal good clinical practice. No patient  
983 identifiable information will be made available through this study. Anonymised surgical audit  
984 outcome data on all patients operated on by trainee ophthalmologists (as part of their normal  
985 supervised and regulated ophthalmology training) in both the 'intervention' and 'control/standard  
986 training' groups of both trials will be collected from their log-books for the period of fifteen months,  
987 between 0 months and 15 months (post-educational intervention). Send a summary audit report to  
988 the PI.

989  
990

991 Qualitative Outcomes / Additional Exploratory Analysis:

992

- 993 6. Surgeon confidence scores: recorded at baseline, three and twelve months (Appendix 5b)
- 994 7. Semi-structured individual interviews conducted in the second week of the training course to  
995 primarily learn about surgical training experience and perspectives (see Appendix 5a). These  
996 interviews will be recorded, transcribed, thematised and analysed. All information will be kept  
997 confidential and anonymous.

998

999

## 1000 Analysis

1001

1002 It is hoped that the majority of participants (25 in each arm, total 50) will complete the educational-  
1003 intervention OLIMPICS study. However, it is recognised that RCTs often suffer from two major  
1004 complications: non-compliance and missing outcomes. Intention-to-treat (ITT) analysis is one  
1005 potential solution to this problem. ITT analysis includes every subject who is randomized according  
1006 to randomized intervention/control assignment. It ignores non-compliance, protocol deviations,  
1007 withdrawal, and anything that happens after randomization. ITT analysis maintains prognostic  
1008 balance generated from the original random treatment allocation. A better application of the ITT  
1009 approach is possible if complete outcome data are available for all randomized subjects. Per-  
1010 protocol population is defined as a subset of the ITT population who completed the study without  
1011 any major protocol violations.<sup>50</sup>

1012

1013 Statistical analysis

1014

1015 The primary outcome measure (mean Sim-OSSCAR score at three months) will be analysed using a t-  
1016 test.

1017

1018 It is expected that the important baseline characteristics will be balanced between the two arms by  
1019 stratified (for training centre) randomisation. This will be reported using a t test, Rank Sum or Chi  
1020 squared test. If this is the case, the outcome in the two arms will be compared by linear regression  
1021 model for Sim-OSSCAR at three months, adjusted for surgical training centre as a fixed effect.  
1022 Adjustment will be made for baseline mean Sim-OSSCAR score in the model. An alpha level of  $p < 0.05$   
1023 will be considered statistically significant, and a  $\gamma$  coefficient of  $\geq 0.75$  for inter-rater agreement.

1024

1025 Qualitative analysis

1026

1027 Semi-structured interviews (conducted as per Appendix 5a) will be recorded, transcribed,  
1028 thematised and analysed. Confidence ratings (Appendix 5b) do contain elements of open-ended  
1029 questions which will be analysed per participant, and per stage of assessment.

1030

1031

1032  
1033

## 1034 Sample size

1035

1036 Based on pilot data from Malawi and Uganda in collected 2015 we anticipate the mean OSSCAR  
1037 (Simulation) score to be 15/40 (S.D.10) at baseline. We anticipate an Effect Size of 0.9SD in the mean  
1038 OSSCAR(Simulation) between the two arms of each trial at one year. We expect such a large effect  
1039 (0.9SD increase) based on piloting of the Sim-OSSCAR(Simulation), and that this increase applies to  
1040 the difference between a 'novice' or 'competent' surgeon in a specific technique, not generally as a  
1041 surgeon.

1042

1043 We also anticipate a fairly strong correlation between the baseline and follow-up scores within  
1044 individual surgeons (in other words, the people who are best at the start would probably still be  
1045 better at the end). We might expect a narrowing of this gap (with the less competent gaining the  
1046 most out of training). Therefore, we assume a correlation between these observations of 0.8.  
1047 Variation between clusters (training institutions) was accounted for with a co-efficient of variation of  
1048 0.5.

1049

1050 Therefore, a sample of 23 individuals in each arm would have 80% power and 95% confidence to  
1051 detect a difference of 9 points (0.9SD) We will recruit 25 per arm in each trial, to provide 2 extra  
1052 participants per arm as we anticipate a modest loss to follow-up.

1053

1054 We and our collaborators consider this sample size of 50 participants per trial to be feasible within  
1055 the available time and financial resources. It would take longer (an extra academic year) if we  
1056 needed to recruit many more.

1057

1058 Table 4 shows different scenarios: sample size calculations for different standard deviations, and  
1059 various baseline correlations.

1060

1061 Table 4: Range of Effect Sizes

1062

|                                                                                           |            | <i>Correlation with baseline measurements</i> |            |            |            |            |            |            |            |            |            |          |
|-------------------------------------------------------------------------------------------|------------|-----------------------------------------------|------------|------------|------------|------------|------------|------------|------------|------------|------------|----------|
|                                                                                           |            | <i>0</i>                                      | <i>0.1</i> | <i>0.2</i> | <i>0.3</i> | <i>0.4</i> | <i>0.5</i> | <i>0.6</i> | <i>0.7</i> | <i>0.8</i> | <i>0.9</i> | <i>1</i> |
| <i>Effect Size (i.e. how many SDs difference between control and intervention groups)</i> | <i>0.1</i> | 1469                                          | 1463       | 1448       | 1421       | 1385       | 1338       | 1280       | 1212       | 1134       | 1045       | 945      |
|                                                                                           | <i>0.2</i> | 384                                           | 383        | 379        | 373        | 364        | 352        | 337        | 320        | 301        | 279        | 254      |
|                                                                                           | <i>0.3</i> | 179                                           | 179        | 177        | 174        | 170        | 165        | 158        | 151        | 142        | 132        | 121      |
|                                                                                           | <i>0.4</i> | 106                                           | 106        | 105        | 103        | 101        | 98         | 94         | 90         | 85         | 80         | 73       |
|                                                                                           | <i>0.5</i> | 71                                            | 71         | 71         | 70         | 68         | 66         | 64         | 61         | 58         | 55         | 51       |
|                                                                                           | <i>0.6</i> | 52                                            | 52         | 52         | 51         | 50         | 49         | 47         | 45         | 43         | 41         | 38       |
|                                                                                           | <i>0.7</i> | 41                                            | 40         | 40         | 40         | 39         | 38         | 37         | 35         | 34         | 32         | 30       |
|                                                                                           | <i>0.8</i> | 33                                            | 33         | 32         | 32         | 31         | 31         | 30         | 29         | 28         | 26         | 25       |
|                                                                                           | <i>0.9</i> | 27                                            | 27         | 27         | 27         | 26         | 26         | 25         | 24         | <b>23</b>  | 22         | 21       |
|                                                                                           | <i>1</i>   | 23                                            | 23         | 23         | 23         | 23         | 22         | 22         | 21         | 20         | 19         | 18       |

1063

1064

1065

## 1066 Prevention of Bias

1067



1068 It is accepted that there will be variability in individual participants' inherent or natural surgical  
1069 aptitude.

1070

1071 All efforts will be made to standardise the training offered to the 'Intervention' participants. The  
1072 intense simulation course will be held in the same standardised surgical training unit at the  
1073 University of Cape Town. The training will be conducted by the PI. All recordings of simulation  
1074 procedures will be performed using the same microscope (Zeiss Stemi 305), and all intervention and  
1075 control participants will wear the same colour blue surgical gloves. All recordings of live surgical  
1076 procedures will be performed using the same operating microscopes (Zeiss OPMI and camera, using  
1077 the Elgato video capture software), with all participants using the same blue surgical gloves, and  
1078 note being taken of if/when the supervising Consultant Ophthalmologist takes over.

1079

1080 Video recordings of procedures will be allocated a random 7-digit number, and subsequently stored  
1081 onto an encrypted computer, and a separate encrypted hard drive. This random number will be the  
1082 only identifiable information available when the simulation/surgical procedure is assessed, thus  
1083 masking the assessor to the participant's intervention/control arm.

1084

1085 It is recognised that surgical education is complex and multi-faceted. However, every effort will be  
1086 made to reduce 'contamination' bias. It will be agreed with Heads of Departments that there will be  
1087 no local comparable or equivalent simulation-based training courses for SICS or trabeculectomy for  
1088 the duration of the study. Participants will furthermore sign an informed consent form detailing that  
1089 they will in no way share any of the details of the course or educational intervention between either  
1090 'intervention' and/or 'control' groups; for a minimum of three months following the primary  
1091 intervention in Cape Town.

1092

### 1093 **Observer Bias**

1094

1095 Recordings will be converted to an MP4 format, and coded. The coding will identify the pre-  
1096 randomisation number of the participant and which trial (e.g. participant 07 in the OLIMPICS trial  
1097 [07OL]; with subsequent numeration of the month of assessment (e.g. month 3 [03]); and finally the  
1098 order of recording of that group of assessment (e.g. second recording of three [02]). This with the  
1099 above example, the second recording of the three-month assessment for the seventh participant in  
1100 the OLIMPICS trial would be enumerated: 07OL0302. This recording will then be saved on a  
1101 password-protected external hard drive, and uploaded to a password-protected DropBox folder by  
1102 an independent administrator (Deon Minnies in UCT). The recording will also then be uploaded to  
1103 the CyberSight website, into a login and password-protected account.

1104

1105 At CyberSight/Orbis, the recording will be renamed as a randomly generated seven-digit number  
1106 (e.g. 6253815). The code sheet will be generated by a LSHTM statistician (Min Kim) and only be  
1107 known to him and the CyberSight administrator (Jonathan Scollard). Once assessors are notified that  
1108 the video is ready for marking, this random number will be the only identifiable information  
1109 available when the simulation/surgical procedure is assessed, thus completely masking the assessor  
1110 to the participant's intervention/control arm and personal identity. Figure 6 details the flow of video  
1111 recording, masked marking, and recording of scores.

1112

1113

1114 Figure 6. Video recording and marking flow diagram  
 1115

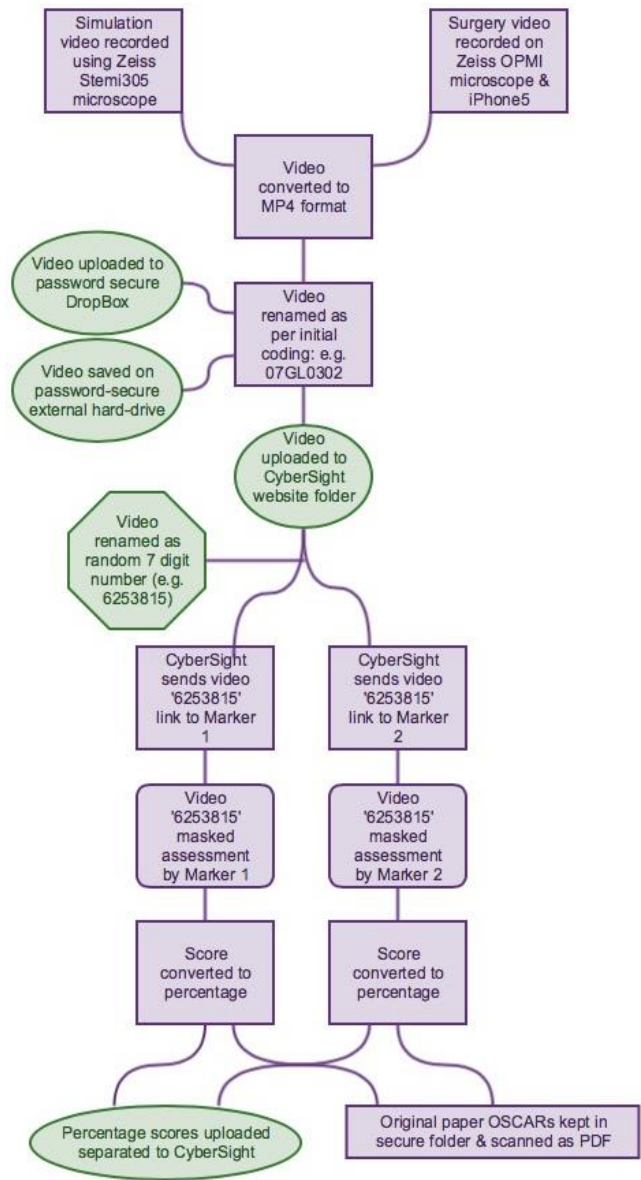

1116  
 1117  
 1118  
 1119  
 1120  
 1121

1122 A number of standard risk-of-bias criteria are suggested for RCTs (or studies with a separate control  
 1123 group). The following are either evaluated within this study protocol, or will be addressed during  
 1124 the SOS Trails as appropriate.  
 1125

1126 Table 5: Risk of bias criteria assessment

| Criteria                                                     | Risk          | Comments                                                                                                                      |
|--------------------------------------------------------------|---------------|-------------------------------------------------------------------------------------------------------------------------------|
| Allocation sequence randomly generated (selection bias)      | Low           | Process described on page 28                                                                                                  |
| Allocation sequence concealed (selection bias)               | Low           | Centralised randomisation scheme (LSHTM)                                                                                      |
| Similarity of baseline outcome measurements                  | Low           | Performance measured prior to intervention (Baseline MCQ and OSSCAR)                                                          |
| Baseline characteristics similar                             | Low           | Intervention & Control participants block randomised within same training institution                                         |
| Blinding of participants & personnel (performance bias)      | Unknown / Low | Participants & PI will know which arm they are in. Objective assessments will be masked.                                      |
| Incomplete outcome data addressed (attrition bias)           | Unknown       | Missing outcome measures may bias the results. ITT (intention-to-treat) analysis possible                                     |
| Study adequately protected against contamination             | Unclear       | Contamination between 'Intervention' and 'Control' groups is possible, but all effort has been made to reduce this.           |
| Study free from selective outcome reporting (reporting bias) | Low           | All outcomes will be included in analysis and reported                                                                        |
| Intervention independent of other changes                    | Low           | Other events/variables within surgical training will be identified and noted, for both arms                                   |
| Intervention likely to affect data collection                | Unclear / Low | Collection of patient-specific surgical outcome data is part of GCP, however, the intervention itself may increase reporting. |

1127  
 1128 The PIs and co-investigators declare that they have no financial or other conflicts of interest.  
 1129

1130

## 1131 **Benefits of the Study**

1132

1133 Benefits to the study participants

1134 The trainee participants in both arms (intervention and control) of both RCTs (cataract and glaucoma  
 1135 surgical training) will receive intense simulation-based surgical education. This is not designed to  
 1136 replace any standard training, but to augment it. Trainees will not only benefit from focussed  
 1137 modular training in Cape Town, but will be enabled to engage in the process of sustained deliberate  
 1138 practice for the months following the course. This sustained deliberate practice, and other  
 1139 education and learning theories employed in this study should form a sound basis for participants in  
 1140 their future journey to becoming proficient and expert surgeons.

1141

1142 An element of training-the-trainers is included in the study. After the first year of training, Trainers  
 1143 and Heads of Departments (from collaborating institutions) will be invited to a Training-the-Trainers  
 1144 course, which would benefit them as Surgeon Educators. Five head trainers will be invited to Cape  
 1145 Town to participate in and run the simulation-based eight-day training courses. Further  
 1146 International expert faculty will also be established for running the courses for the 'control' arms  
 1147 (after year 1).

1148

1149

1150 General benefits

1151 The results of these two trials would have major implications in augmenting and streamlining  
1152 ophthalmic surgical education, and potentially changing the way ophthalmologists approach initial  
1153 surgical training entirely. More importantly this study could have major impact on the safety of the  
1154 initial surgical training: reducing patient complications while the training eye surgeon moves from  
1155 'novice' to 'competent'.

1156

1157 Finally, the evidence provided from this study could influence investment in surgical training units  
1158 throughout the COECSA Region, and beyond.

1159

## 1160 Risks

1161

1162 There are **no clinical risks** within this study, as all the intervention training is using simulation. No  
1163 patients are involved in any of the training. Patients are involved only as part of fully-supervised,  
1164 standardised, regulated and accredited post-graduate clinical and surgical training within the  
1165 collaborating training institutions.

1166

1167 There are a number of broad risks in conducting this study.

1168

- 1169 • Trainees not being available for enrolment (due to examinations, closure of training  
1170 institutions, personal reasons, visa or passport issues).
- 1171 • Civil unrest (including national elections in Kenya, election and succession planning in  
1172 Uganda).
- 1173 • No patients being available in hospital for standard and ongoing surgical training (especially  
1174 true for glaucoma patients).
- 1175 • No or very few patients being enrolled for video assessments (applicable to both Trials, but  
1176 especially true for glaucoma patients). This risk is inherent in glaucoma surgical training  
1177 throughout the world. Glaucoma Specialist Consultants are often very hesitant to allow  
1178 more junior trainees to perform trabeculectomy.
- 1179 • Surgery on patients is regulated by local and national training institution protocol, and by  
1180 the national Medical Councils. As part of normal standardised training, supervision of  
1181 surgery conducted by trainees is also regulated.

1182

## 1183 Training Timetable:

1184

1185 Four trainee participants will be invited for each six-day course. Trainees from different countries,  
1186 or the same country will be allowed. The PI will conduct all the training for the 'intervention' arm for  
1187 standardisation. In year two, the controls will be trained in Cape Town, with the same course;  
1188 however a faculty of senior surgical trainers from SSA, including the five participating centres and  
1189 further afield will deliver the training.

1190

1191

1192 **Figure 6.** Detailed timeline of recruitment, assessment, and training.

1193

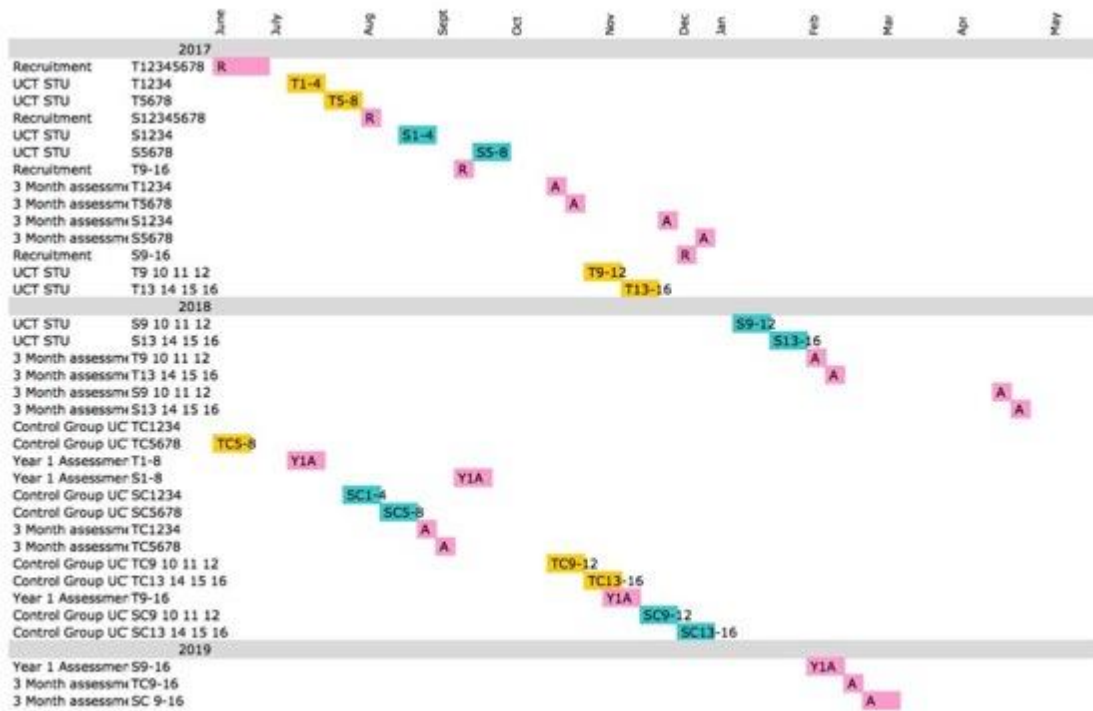

- 1194
- 1195 Key: T = Trabeculectomy training 'intervention' arm participant
- 1196 S = SICS training 'intervention' arm participant
- 1197 TC = Trabeculectomy training 'control' arm participant
- 1198 SC = SICS training 'control' arm participant
- 1199 UCT STU = University of Cape Town Surgical Training Unit
- 1200
- 1201
- 1202
- 1203
- 1204

1205

## 1206 **Data Management**

1207

1208 All recordings of surgeries (either simulated or real) will be anonymised. Recordings will be kept on  
1209 an encrypted computer hard drive, and a separate back-up encrypted hard-drive in a safe in a locked  
1210 office by the Principal Investigator, and numerically randomised. Any identifiable information (of  
1211 the performing surgeon) will be kept separately on an encrypted spreadsheet. No patient  
1212 identifiable information will be recorded at any time. Recordings will be transported on an  
1213 encrypted hard-drive where possible. If this is not practical (in terms of delivering the videos to a  
1214 masked assessor), then the videos will be uploaded to the secure CyberSight website. The website  
1215 will send a notification to the assessor that a video has been uploaded and is ready for assessment,  
1216 however the assessor will need a login name and password to access the website and video.

1217

## 1218 **Expected Outcomes of the Study**

1219

1220 The outcome of this study is to test the Null Hypothesis that there is no association or relationship  
1221 between the educational intervention of 'intense simulation-based surgical education' versus  
1222 'standard surgical training' in Sub-Saharan Africa (for glaucoma and separately for cataract surgical  
1223 competency).

1224

1225 If the analysed data from this study does indeed statistically prove the alternate hypothesis, then  
1226 there is the potential that the results will be a true 'game-changer' for ophthalmic surgical training,  
1227 not only in sub-Saharan Africa, but globally. This study has the potential of proving, and providing  
1228 the robust data, that simulation-based surgical education in the two major causes of global  
1229 blindness improves competence and outcomes.

1230

## 1231 **Quality Assurance**

1232

1233 Good Clinical Practice

1234

1235 Institutional, National, and Regional Good Clinical Practice (GCP) guidelines will be followed and  
1236 monitored in terms of training, performance of supervised surgery as part of training, patient care,  
1237 patient confidentiality, and monitoring of outcomes of surgery.

1238

1239 Data management

1240

1241 All data collected will be anonymised: no participant or patient identifiable information will be  
1242 available. The anonymization and randomisation data will be kept separately. All data will be backed  
1243 up weekly on an encrypted external hard-drive.

1244

## 1245 **Project Management**

1246

## 1247 **Study Management**

1248

1249 Overall study management responsibility lies with the Principal Investigator. Three monthly Project  
1250 Update Reports will be circulated to co-investigators. Six monthly reports will be sent to the three  
1251 major funders. Weekly Project Reports will be sent to the Principal Investigator (LSHTM).

1252

1253 Advisory Panel

1254

1255 The advisory panel are:

- 1256 • Dr Simon Arunga, MURHEC, Mbarara, Uganda
- 1257 • Miss Morgon Banks, ICEH, LSHTM (Qualitative research)
- 1258 • Dr John Buchan, ICEH, LSHTM
- 1259 • Professor Colin Cook, Department of Ophthalmology, University of Cape Town, South Africa
- 1260 • Dr Stephen Gichuhi, University of Nairobi, Kenya
- 1261 • Min Kim, LSHTM (Statistics & quantitative research)
- 1262 • Dr William U Makupa, KCMC, Moshi, Tanzania
- 1263 • Dr Agrippa Mukome, University of Zimbabwe, Harare
- 1264 • Dr Juliet Oti, Makerere, Uganda
- 1265 • Dr Francisco Pozo-Martin, LSHTM, UK (Healthcare Economics)

1266

1267

1268

## 1269 **Funding**

1270

1271 The British Council for the Prevention of Blindness (London, UK)

1272

1273 Ulverscroft Foundation (Leicester, UK)

1274

1275 CBM USA (Greenville, SC, USA)

1276

1277 The Queen Elisabeth Diamond Jubilee Trust (London, UK)

1278

1279 L'Occitane Foundation (Paris, France)

1280

## 1281 **Medical Registration**

1282

1283 No medical registration is necessary for participants in South Africa, as no patients will be involved in  
1284 the simulation-based surgical training. The principal investigator will neither be registered with the  
1285 Medical Councils of Kenya, Tanzania, Uganda or Zimbabwe; again, as no patients will be operated on  
1286 by him.

1287

## 1288 **Trial Registration**

1289

1290 The study will be registered at the London School of Hygiene and Tropical Medicine and the Pan-  
1291 African Clinical Trial Registry.

1292

## 1293 **Data and safety management**

1294

1295 All participant information will be randomised, anonymised and encrypted. All patient-related  
1296 surgical outcomes data will be anonymised and numerated as per local policy. No patient  
1297 identifiable information will be made available outside of the hospital or training institution, or be  
1298 made available in any form to the PI.  
1299  
1300

## 1301 Ethical Considerations

1302

### 1303 Ethical Approval

1304

1305 Ethics approval would be obtained from National Ethics Committees of Kenya, Tanzania, Uganda,  
1306 and Zimbabwe. Ethics approval has already been attained from the London School of Hygiene and  
1307 Tropical Medicine (reference: 11795) and University of Cape Town (references: UCT HREC 259/2017,  
1308 and DRC 2016/191).

1309

1310 The initial Pilot studies in 2015 were approved by the Medicine Education Ethics Committee (MEEC)  
1311 Coordinator, Faculty Education Office (Medicine), Imperial College, London (MEEC1415-12).  
1312 Furthermore approval from the University of Malawi and the Mbarara University of Science and  
1313 Technology was sought, and ethics waivers were obtained.

1314

1315 Educational ethics are important to consider separately for this study.

1316

### 1317 Patient Informed Consent

1318

1319 Patient participants will be informed that the outcomes of their surgery will be recorded as per  
1320 normal good clinical practice and standard training. At the three month, year one, and fifteen-  
1321 month assessment, three patients per 'intervention' participant and three patients per 'control'  
1322 participant will be asked for informed consent to video record their surgery. The surgery will be  
1323 anonymised, and no patient identifiable information will be kept. Patients have the right to refuse  
1324 consent for video recording, and this in no way will affect their treatment or surgery plan.  
1325 Photographs or videos of patients are often a part of clinical practice, teaching, telemedicine, or  
1326 research. A standard consent form (Appendix 6), similar to local consent forms for clinical  
1327 photography for research purposes only, will be read to patients in their local language; and they will  
1328 be invited to sign.

1329

### 1330 Participant / Trainee Informed Consent

1331

1332 Each trainee eye surgeon attending the training and involved in qualitative research will be invited  
1333 to read and sign a consent form (Appendix 1). It is important to emphasise that there is no fee for  
1334 the course and all educational materials are given free of charge.

1335

1336 Participant trainees should understand that the course is for their personal educational benefit, and  
1337 they give permission for anonymised data from the study to be published in peer-reviewed literature  
1338 as part of broader research into surgical training techniques.

1339

1340 **No personal identifiable information** will be included at any stage.

1341

1342 Interviews, opinions, video recordings of assessments, and surgical outcome data of the education  
1343 and training will only be used for academic purposes.



1344  
1345  
1346  
1347  
1348  
1349  
1350  
1351  
1352  
1353  
1354  
1355  
1356  
1357  
1358  
1359  
1360  
1361  
1362  
1363  
1364  
1365  
1366  
1367  
1368  
1369  
1370  
1371  
1372  
1373  
1374  
1375  
1376  
1377  
1378  
1379  
1380  
1381

No assessment or report will be given to any of the participant trainees' colleagues, or surgical or educational supervisors. In other words, this training is as a boost to 'standard training', and not a replacement: none of the results of this study of training will form a part of the participants' training record.

None of the data collected or reported will be made available to work/training institutions or be used for any future job selection. A 'certificate of attendance' will be provided to all participants who complete the training (in both the 'intervention' and 'control' groups) in Cape Town and subsequent three-month assessment. However, it will be made clear that this certificate and all/any of the training carries no accreditation, nor official continuous professional development (CPD) points.

Trainee participants are free to leave the study at any time. If this is the case for any participant, no effort will be made to recover any costs incurred or equipment provided.

It is important to clarify that trainee participants in the 'control' arm will be offered exactly the same training as the 'intervention' arm, only one year later.

Patients with cataract and glaucoma are indirectly involved in this study. However, it is important to emphasise that supervised surgery conducted in this study, by trainee participants (in both the intervention and control arms), is part of standard and regulated training; and supervised by qualified and registered senior eye surgeons as per normal practice.

Patient outcome data will be anonymised, and no personal patient identifiable information will be made public, and **no personal patient identifiable information will be made available** to any of the Investigators outside of the country. Patients operated in both the 'intervention' and 'control' arms will be during normal standard training, and thus regulated by the Medical Councils and Educational Training Committees of Kenya, Malawi, Tanzania and Uganda.

The research adheres to the tenets of the Declaration of Helsinki.

1382 **Dissemination of Results and Publication Policy**

1383

1384 There will be a number of separate aspects of this research to analyse and develop into articles for  
1385 submission to international peer-reviewed journals.

1386

1387 Co-authorship of submitted and published articles will be evaluated as per internationally agreed  
1388 research guidelines:

1389

1390 Authorship credit should be based on:

1391

1392 1. Substantial contributions to conception and design, or acquisition of data, or analysis and  
1393 interpretation of data;

1394 2. Drafting the article or revising it critically for important intellectual content; and

1395 3. Final approval of the version to be published.

1396

1397 Authors should meet conditions 1, 2, *and* 3.

1398 **References**

1399  
1400  
1401  
1402  
1403  
1404  
1405  
1406  
1407  
1408  
1409  
1410  
1411  
1412  
1413  
1414  
1415  
1416  
1417  
1418  
1419  
1420  
1421  
1422  
1423  
1424  
1425  
1426  
1427  
1428  
1429  
1430  
1431  
1432  
1433  
1434  
1435  
1436  
1437  
1438  
1439  
1440  
1441  
1442  
1443  
1444  
1445  
1446

REFERENCES

1. Flaxman SR, Bourne RRA, Resnikoff S, et al. Global causes of blindness and distance vision impairment 1990-2020: a systematic review and meta-analysis. *Lancet Glob Health* 2017;5(12):e1221-e34. doi: 10.1016/S2214-109X(17)30393-5 [published Online First: 2017/10/17]
2. Hennig A, Kumar J, Yorston D, et al. Sutureless cataract surgery with nucleus extraction: outcome of a prospective study in Nepal. *The British journal of ophthalmology* 2003;87(3):266-70. [published Online First: 2003/02/25]
3. Ruit S, Tabin G, Chang D, et al. A prospective randomized clinical trial of phacoemulsification vs manual sutureless small-incision extracapsular cataract surgery in Nepal. *Am J Ophthalmol* 2007;143(1):32-38. doi: S0002-9394(06)00863-4 [pii] 10.1016/j.ajo.2006.07.023 [published Online First: 2006/12/26]
4. Riaz Y, de Silva SR, Evans JR. Manual small incision cataract surgery (MSICS) with posterior chamber intraocular lens versus phacoemulsification with posterior chamber intraocular lens for age-related cataract. *Cochrane Database Syst Rev* 2013;10:CD008813. doi: 10.1002/14651858.CD008813.pub2
5. Gogate P, Optom JJ, Deshpande S, et al. Meta-analysis to Compare the Safety and Efficacy of Manual Small Incision Cataract Surgery and Phacoemulsification. *Middle East Afr J Ophthalmol* 2015;22(3):362-9. doi: 10.4103/0974-9233.159763
6. Palmer JJ, Chinanayi F, Gilbert A, et al. Trends and implications for achieving VISION 2020 human resources for eye health targets in 16 countries of sub-Saharan Africa by the year 2020. *Hum Resour Health* 2014;12:45. doi: 10.1186/1478-4491-12-45
7. Resnikoff S, Pascolini D, Etya'ale D, et al. Global data on visual impairment in the year 2002. *Bulletin of the World Health Organization* 2004;82(11):844-51. doi: S0042-96862004001100009 [pii] /S0042-96862004001100009 [published Online First: 2005/01/11]
8. Bastawrous A, Hennig BD. The global inverse care law: a distorted map of blindness. *Br J Ophthalmol* 2012;96(10):1357-8. doi: 10.1136/bjophthalmol-2012-302088
9. Resnikoff S, Felch W, Gauthier TM, et al. The number of ophthalmologists in practice and training worldwide: a growing gap despite more than 200,000 practitioners. *Br J Ophthalmol* 2012;96(6):783-7. doi: 10.1136/bjophthalmol-2011-301378
10. Sommer A, Spivey BE. Access to cataract surgical services: international ophthalmology accepts the challenge. *Am J Ophthalmol* 2011;151(6):925-27 e2. doi: 10.1016/j.ajo.2011.02.005
11. IAPB. Training Institutions Database IAPB Africa 2015 [Available from: <https://iapblive.blob.core.windows.net/resources/1d5f5f5218244b8e9b4563726858d105.pdf?width=150&height=150> accessed 13 Feb 2017.
12. Whitfield R, Jr. Dealing with cataract blindness. Part III: Paramedical cataract surgery in Africa. *Ophthalmic Surg* 1987;18(10):765-7. [published Online First: 1987/10/01]
13. Lewallen S, Etya'ale D, Kello AB, et al. Non-physician cataract surgeons in Sub-Saharan Africa: situation analysis. *Trop Med Int Health* 2012 doi: 10.1111/j.1365-3156.2012.03084.x [published Online First: 2012/09/15]
14. Gogate P, Deshpande M, Nirmalan PK. Why do phacoemulsification? Manual small-incision cataract surgery is almost as effective, but less expensive. *Ophthalmology* 2007;114(5):965-8. doi: S0161-6420(06)01338-8 [pii]

- 1447 10.1016/j.opthta.2006.08.057 [published Online First: 2007/02/14]
- 1448 15. HariPriya A, Chang DF, Reena M, et al. Complication rates of phacoemulsification and  
1449 manual small-incision cataract surgery at Aravind Eye Hospital. *Journal of cataract*  
1450 *and refractive surgery* 2012;38(8):1360-9. doi: 10.1016/j.jcrs.2012.04.025
- 1451 16. Lee AG, Greenlee E, Oetting TA, et al. The Iowa ophthalmology wet laboratory  
1452 curriculum for teaching and assessing cataract surgical competency. *Ophthalmology*  
1453 2007;114(7):e21-6. doi: S0161-6420(06)01183-3 [pii]
- 1454 10.1016/j.opthta.2006.07.051 [published Online First: 2007/05/04]
- 1455 17. Congdon N, Yan X, Lansingh V, et al. Assessment of cataract surgical outcomes in  
1456 settings where follow-up is poor: PRECOG, a multicentre observational study. *Lancet*  
1457 *Glob Health* 2013;1(1):e37-45. doi: 10.1016/S2214-109X(13)70003-2
- 1458 18. Limburg H, Foster A, Gilbert C, et al. Routine monitoring of visual outcome of cataract  
1459 surgery. Part 2: Results from eight study centres. *Br J Ophthalmol* 2005;89(1):50-2.  
1460 doi: 10.1136/bjo.2004.045369
- 1461 19. Limburg H, Foster A, Gilbert C, et al. Routine monitoring of visual outcome of cataract  
1462 surgery. Part 1: Development of an instrument. *Br J Ophthalmol* 2005;89(1):45-9.  
1463 doi: 10.1136/bjo.2004.045351
- 1464 20. Jaycock P, Johnston RL, Taylor H, et al. The Cataract National Dataset electronic multi-  
1465 centre audit of 55,567 operations: updating benchmark standards of care in the  
1466 United Kingdom and internationally. *Eye (Lond)* 2009;23(1):38-49. doi:  
1467 10.1038/sj.eye.6703015
- 1468 21. Buckley CE, Kavanagh DO, Traynor O, et al. Is the skillset obtained in surgical simulation  
1469 transferable to the operating theatre? *Am J Surg* 2014;207(1):146-57. doi:  
1470 10.1016/j.amjsurg.2013.06.017
- 1471 22. McGaghie WC, Issenberg SB, Petrusa ER, et al. A critical review of simulation-based  
1472 medical education research: 2003-2009. *Med Educ* 2010;44(1):50-63. doi:  
1473 10.1111/j.1365-2923.2009.03547.x
- 1474 23. Sackier JM, Berci G, Paz-Partlow M. A new training device for laparoscopic  
1475 cholecystectomy. *Surg Endosc* 1991;5(3):158-9.
- 1476 24. Forrest K, McKimm J, Edgar S. *Simulation in Clinical Education: Wiley-Blackwell* 2013.
- 1477 25. Kneebone RL. Practice, rehearsal, and performance: an approach for simulation-based  
1478 surgical and procedure training. *JAMA* 2009;302(12):1336-8. doi: 302/12/1336 [pii]  
1479 10.1001/jama.2009.1392 [published Online First: 2009/09/24]
- 1480 26. Issenberg SB, McGaghie WC, Petrusa ER, et al. Features and uses of high-fidelity medical  
1481 simulations that lead to effective learning: a BEME systematic review. *Med Teach*  
1482 2005;27(1):10-28. doi: 10.1080/01421590500046924
- 1483 27. Thomsen AS, Subhi Y, Kiilgaard JF, et al. Update on simulation-based surgical training  
1484 and assessment in ophthalmology: a systematic review. *Ophthalmology*  
1485 2015;122(6):1111-30 e1. doi: 10.1016/j.opthta.2015.02.028
- 1486 28. COECSA. COECSA Curriculum 2015 [Available from:  
1487 <http://curriculum.coecea.org/course/index.php?categoryid=1> accessed 23 July 2015.
- 1488 29. Bligh J, Bleakley A. Distributing menus to hungry learners: can learning by simulation  
1489 become simulation of learning? *Med Teach* 2006;28(7):606-13. doi:  
1490 10.1080/01421590601042335
- 1491 30. Stefanidis D, Sevdalis N, Paige J, et al. Simulation in surgery: what's needed next? *Ann*  
1492 *Surg* 2015;261(5):846-53. doi: 10.1097/SLA.0000000000000826
- 1493 31. Phillips C. Ophthalmic Simulated Surgery: Phillips Eye Studio [Available from:  
1494 <http://www.phillipsstudio.co.uk/> accessed 1 May 2015.

- 1495 32. Privett B, Greenlee E, Rogers G, et al. Construct validity of a surgical simulator as a valid  
1496 model for capsulorhexis training. *J Cataract Refract Surg* 2010;36(11):1835-8. doi:  
1497 S0886-3350(10)01210-1 [pii]  
1498 10.1016/j.jcrs.2010.05.020 [published Online First: 2010/10/30]
- 1499 33. Feudner EM, Engel C, Neuhann IM, et al. Virtual reality training improves wet-lab  
1500 performance of capsulorhexis: results of a randomized, controlled study. *Graefes*  
1501 *Arch Clin Exp Ophthalmol* 2009;247(7):955-63. doi: 10.1007/s00417-008-1029-7
- 1502 34. Waqar S, Park J, Kersey TL, et al. Assessment of fatigue in intraocular surgery: analysis  
1503 using a virtual reality simulator. *Graefes Arch Clin Exp Ophthalmol* 2011;249(1):77-  
1504 81. doi: 10.1007/s00417-010-1531-6
- 1505 35. Jonas JB, Rabethge S, Bender HJ. Computer-assisted training system for pars plana  
1506 vitrectomy. *Acta Ophthalmol Scand* 2003;81(6):600-4.
- 1507 36. Sikder S, Luo J, Banerjee PP, et al. The use of a virtual reality surgical simulator for  
1508 cataract surgical skill assessment with 6 months of intervening operating room  
1509 experience. *Clin Ophthalmol* 2015;9:141-9. doi: 10.2147/OPHTH.S69970
- 1510 37. Thomsen AS, Kiilgaard JF, Kjaerbo H, et al. Simulation-based certification for cataract  
1511 surgery. *Acta Ophthalmol* 2015;93(5):416-21. doi: 10.1111/aos.12691
- 1512 38. Singh A, Strauss GH. High-fidelity cataract surgery simulation and third world blindness.  
1513 *Surg Innov* 2015;22(2):189-93. doi: 10.1177/1553350614537120
- 1514 39. Saleh GM, Gauba V, Mitra A, et al. Objective structured assessment of cataract surgical  
1515 skill. *Arch Ophthalmol* 2007;125(3):363-6. doi: 125/3/363 [pii]  
1516 10.1001/archophth.125.3.363 [published Online First: 2007/03/14]
- 1517 40. Fisher JB, Binenbaum G, Tapino P, et al. Development and face and content validity of an  
1518 eye surgical skills assessment test for ophthalmology residents. *Ophthalmology*  
1519 2006;113(12):2364-70. doi: S0161-6420(06)01135-3 [pii]  
1520 10.1016/j.ophtha.2006.08.018 [published Online First: 2006/10/24]
- 1521 41. Taylor JB, Binenbaum G, Tapino P, et al. Microsurgical lab testing is a reliable method for  
1522 assessing ophthalmology residents' surgical skills. *Br J Ophthalmol* 2007;91(12):1691-  
1523 4. doi: 10.1136/bjo.2007.123083
- 1524 42. Cremers SL, Ciolino JB, Ferrufino-Ponce ZK, et al. Objective Assessment of Skills in  
1525 Intraocular Surgery (OASIS). *Ophthalmology* 2005;112(7):1236-41. doi: S0161-  
1526 6420(05)00289-7 [pii]  
1527 10.1016/j.ophtha.2005.01.045 [published Online First: 2005/06/01]
- 1528 43. Golnik KC, Beaver H, Gauba V, et al. Cataract surgical skill assessment. *Ophthalmology*  
1529 2011;118(2):427 e1-5. doi: S0161-6420(10)01034-1 [pii]  
1530 10.1016/j.ophtha.2010.09.023 [published Online First: 2011/02/05]
- 1531 44. Dreyfus SE, Dreyfus HL. A Five-Stage Model of the Mental Activities Involved in Directed  
1532 Skill Acquisition. 1980
- 1533 45. Kakande I, Mkandawire N, Thompson MIW. A Review of Surgical Capacity and Surgical  
1534 Education Programmes in The COSECSA  
1535 Region. *East Cent Afr J surg* 2011;16(3):6-34.
- 1536 46. Lowry EA, Porco TC, Naseri A. Cost analysis of virtual-reality phacoemulsification  
1537 simulation in ophthalmology training programs. *J Cataract Refract Surg*  
1538 2013;39(10):1616-7. doi: 10.1016/j.jcrs.2013.08.015
- 1539 47. Abdelfattah NS, Radwan AE, Sadda SR. Perspective of ophthalmology residents in the  
1540 United States about residency programs and competency in relation to the  
1541 International Council of Ophthalmology guidelines. *J Curr Ophthalmol*  
1542 2016;28(3):146-51. doi: 10.1016/j.joco.2016.06.001

- 1543 48. Young AL, Jhanji V, Liang Y, et al. A survey of perceived training differences between  
1544 ophthalmology residents in Hong Kong and China. *BMC Med Educ* 2015;15:158. doi:  
1545 10.1186/s12909-015-0440-0
- 1546 49. Golnik KC, Haripriya A, Beaver H, et al. Cataract surgery skill assessment. *Ophthalmology*  
1547 2011;118(10):2094-94 e2. doi: 10.1016/j.opthta.2011.06.039
- 1548 50. Gupta SK. Intention-to-treat concept: A review. *Perspect Clin Res* 2011;2(3):109-12. doi:  
1549 10.4103/2229-3485.83221
- 1550
- 1551

1552 **Appendices**

1553

1554

1555

1556

1557 **Appendix 1 Informed Consent Forms & Participant Information Sheets**

1558 **Appendix 2 Budget**

1559 **Appendix 3 OSSCARs and OSCAR**

1560 **Appendix 4 Questionnaire**

1561 **Appendix 5 Semi-structured Interview & Confidence Scoring**

1562 **Appendix 6 Patient Consent to Clinical Photography Form**

1563

1564

1565

1566

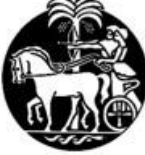

1567 **Appendix 1a** **Participant Consent Form (SOS)**

1568  
1569 The Simulated Ocular Surgery (SOS) Trials: Randomised-Controlled Trials Comparing Intense  
1570 Simulation-Based Surgical Education for Cataract and Glaucoma Surgery to Conventional Training  
1571 Alone in East Africa. OLIMPICS Trial (Ophthalmic Learning & Improvement Initiative in Cataract  
1572 Surgery)

1573  
1574 International Centre for Eye Health, London School of Hygiene & Tropical Medicine, UK  
1575 University of Cape Town, South Africa  
1576 Mbarara University of Science and Technology, Uganda  
1577 University of Nairobi, Kenya  
1578 Kilimanjaro Christian Medical Centre, Tanzania  
1579 Makerere University, Uganda  
1580 University of Zimbabwe, Harare

1581  
1582 I \_\_\_\_\_ (name) have  
1583 been invited to participate in a trial of surgical training, involving an eight day intense training and  
1584 education course for cataract surgery in Cape Town, South Africa and ongoing assessment for the  
1585 following 15 months. I understand there is no fee for the course, and all educational materials are  
1586 given free of charge. I understand that the course is for my personal educational benefit.

1587 Study Reference Number: 

|  |  |  |  |  |
|--|--|--|--|--|
|  |  |  |  |  |
|--|--|--|--|--|

1588

|                                                                                                                                                                                                                                                                                                                                                 |                          |
|-------------------------------------------------------------------------------------------------------------------------------------------------------------------------------------------------------------------------------------------------------------------------------------------------------------------------------------------------|--------------------------|
| Please initial box                                                                                                                                                                                                                                                                                                                              |                          |
| 1. I confirm that I have read and understand the participant information sheet dated ..... (version .....) for the above study. I have had the opportunity to consider the information, ask questions and have had these answered fully.                                                                                                        | <input type="checkbox"/> |
| 2. I understand that my participation is voluntary and I am free to withdraw at any time, without giving any reason, without training or legal rights being affected.                                                                                                                                                                           | <input type="checkbox"/> |
| 3. I give my permission for anonymised data from this course to be published in peer-reviewed literature as part of broader research into surgical training techniques, including the placement of an anonymized data set in a data repository.                                                                                                 | <input type="checkbox"/> |
| 4. I understand that <b>no personal identifiable information</b> will be included in any published output.                                                                                                                                                                                                                                      | <input type="checkbox"/> |
| 5. I understand that interviews, opinions, or recordings of the education and training will only be used for academic purposes.                                                                                                                                                                                                                 | <input type="checkbox"/> |
| 6. I understand that no formal feedback will be given to any of my colleagues or surgical supervisors                                                                                                                                                                                                                                           | <input type="checkbox"/> |
| 7. I understand that no data will be made available to work/training institutions or be used for any future job selection.                                                                                                                                                                                                                      | <input type="checkbox"/> |
| 8. I agree to anonymised video recording and assessment at baseline, three / twelve / fifteen months of my surgery                                                                                                                                                                                                                              | <input type="checkbox"/> |
| 9. I commit to ensuring that <b>all</b> surgical outcome data for patients operated by myself (supervised or other) for SICS, that this data (day 1 VA and complications of PCR) is captured onto a recording sheet (with no patient identifiable data), and reported for a fifteen-month period (from initial intervention to fifteen months). | <input type="checkbox"/> |
| 10. I finally understand, agree, and wholly commit to NOT discussing or sharing any of the details in any way with the 'control' group of peers in this study for at least the first three months after the Cape Town training.                                                                                                                 | <input type="checkbox"/> |

1589  
1590  
1591



1592  
1593  
1594  
1595  
1596  
1597  
1598  
1599  
1600  
1601  
1602  
1603  
1604  
1605  
1606  
1607  
1608  
1609  
1610  
1611  
1612  
1613  
1614  
1615  
1616  
1617  
1618

Signed \_\_\_\_\_ Date: \_\_\_\_\_

Countersigned by Principal Investigator (Dr Will Dean)

Principle Investigator (Africa) / PhD Student: Dr William H Dean FRCOphth MEd MBChB BSc  
Principle Investigator (LSHTM): Prof. Matthew Burton PhD FRCOphth

Co-Investigators:

Dr Simon Arunga FCOECSA MMed(Oph) MBChB  
Dr John Buchan MBBS FRCOphth MD  
Prof Colin Cook MBChB DO MPH FRCOphth FCS(Ophth)SA  
Dr Stephen Gichuhi PhD MMed  
Dr Agrippa Mnukome MBChB MMed  
Dr William U Makupa MD, MMed Ophth, FCOphth ECSA, VRS  
Dr Juliet Otiti MBChB MMed(Ophth)

Any queries should be directed in the first instance to the Principal Investigator Dr Will Dean:  
Will.Dean@lshtm.ac.uk  
Phone: UK +44(0)7899 753 953 RSA +27(0)710 701 272

***Please refer to Participant Information Sheet (OLIMPICS Version 1.0)***

## 1619 **Appendix 1c Participant Information Sheet – SICS Training**

1620 The Simulated Ocular Surgery (SOS) Trials: Randomised-Controlled Trials Comparing Intense  
1621 Simulation-Based Surgical Education for Cataract and Glaucoma Surgery to Conventional Training  
1622 Alone in East Africa. The OLIMPICS Trial (Ophthalmic Learning & Improvement Initiative in Cataract  
1623 Surgery).

1624

### 1625 **Participant Information Sheet (OLIMPICS Version 1.0)**

1626

1627 International Centre for Eye Health, London School of Hygiene & Tropical Medicine, UK

1628 Mbarara University of Science and Technology, Uganda

1629 University of Nairobi, Kenya

1630 Kilimanjaro Christian Medical Centre, Tanzania

1631 Makerere University, Uganda

1632 University of Zimbabwe, Harare

1633 University of Cape Town, South Africa

1634

1635 LSHTM Principal Investigator: Dr William Dean FRCOphth MEd MBChB BSc

1636 Kenya Principal Investigator: Dr Stephen Gichuhi PhD

1637 Tanzania Principal Investigator: Dr William Makupa MD, MMed Ophth, FCOphth ECSA, VRS

1638 Uganda Principal Investigators: Dr Simon Arunga MMed

1639 Dr Juliet Otiti MMed

1640 Zimbabwe Principal Investigator: Professor Rangarirai Masanganise MBChB FRCOphth MMed

1641 Sc(Clin Epid)

1642

1643

1644

### 1645 **Introduction**

1646

1647 You are being invited to take part in an educational-intervention research study. Before you decide  
1648 whether or not you will be a participant, it is important for you to understand why this research is  
1649 being done and what it will involve.

1650

1651 Please take time to read the following information carefully. Talk to others about the study,  
1652 including your training programme Director, if you wish. Ask us if there is anything that is not clear  
1653 or if you would like more information.

1654

1655 This form is designed to tell you everything you need to think about before you decide whether or  
1656 not you agree to be in the study. It is entirely your choice. If you decide to take part, you can change  
1657 your mind later on and withdraw from the study. The decision to join or not join the study will not  
1658 cause you to lose any of your usual training opportunities within your MMed Ophthalmology  
1659 Training Institution course.

1660

1661 You can take a copy of this information sheet, to keep. Do not sign the consent form unless you have  
1662 had a chance to ask questions and get answers that make sense to you. By signing this form you will  
1663 not give up any legal rights.

1664

1665

### 1666 **Do you have to take part in this study?**

1667 No. You do not have to take part in this study. Even if you do not take part in this study you will still  
1668 be offered exactly the same training as per your training institution and curriculum.

1669

1670

1671

1672 **Study Overview**

1673

1674 **What is the study about?**

1675 Globally there are an estimated 39 million people who are blind and a further 124 million with  
1676 significant visual impairment (excluding uncorrected refractive error). Approximately 80% of  
1677 blindness is preventable or treatable, and 90% of the burden is in Low and Middle Income Countries  
1678 (LMIC). Sub-Saharan Africa (SSA) has the highest prevalence of blindness of any region at 9% in >50  
1679 year olds. Age-related cataract accounts for about half this blindness. Small incision cataract surgery  
1680 (SICS) is a widely accepted, appropriate and affordable procedure with high quality visual outcomes.  
1681 Glaucoma is the second leading cause of blindness in SSA (15%), and surgical trabeculectomy is often  
1682 the primary treatment, partly due to the challenges of sustaining medical therapy. Together,  
1683 cataract and glaucoma account for two-thirds of blindness in SSA, and both require surgical  
1684 management. However, SSA is the region with the lowest number of ophthalmologists per capita,  
1685 with about 2.6 per million.

1686

1687 The College of Ophthalmology of Eastern Central and Southern Africa (COECSA) has adopted a  
1688 competency-based curriculum for ophthalmic trainees in the region. There are a number of learning  
1689 domains, one of which is surgical skills (SS). Of the seventeen separate surgical skills to be learnt,  
1690 the very first, 'SS1', is 'Simulation and Wetlab'. This illustrates the importance placed within COECSA  
1691 on the use of simulation in surgical training. It has been acknowledged however that the curriculum-  
1692 integration of simulation is only in its infancy, as with many ophthalmology training programmes  
1693 around the world. There is no coherent, sustainable, standardised and educationally-underpinned  
1694 regional training programme employing simulation. Furthermore, there is no robust evidence or  
1695 significant data testing the efficacy of simulation-based surgical education in cataract and glaucoma  
1696 surgery.

1697

1698 Of the more than two hundred thousand ophthalmologists in the world, a disproportionately low  
1699 number are trained and work in sub-Saharan Africa. The shortage of expert eye surgeons in SSA is  
1700 well documented in the literature. This leads to a number of challenges, including the amount of  
1701 time is available for training. There is a need to develop innovative, efficient, well-evidenced, and  
1702 cost-effective strategies for ophthalmic training in the SSA Region, and Globally.

1703

1704 This is a prospective, single-masked randomised controlled education-intervention trials of intense  
1705 simulation-based surgical education versus current standard training of ophthalmologists-in-training  
1706 in four East African countries. The aim is to investigate whether simulation-based surgical education  
1707 improves competence, knowledge, surgical outcomes, and confidence. All participants will (by the  
1708 end of the study) receive the educational intervention of 'eight-days intense simulation-based  
1709 training' at the Surgical Training Unit, University of Cape Town. The intervention groups will receive  
1710 this training at week one; and the matched controls after a period of one year. The 'intervention  
1711 training' specifically is an five-day intense course of lectures, small-group teaching, practical surgical  
1712 simulation training, videos, and assessments. This training is in addition to the trainees' normal  
1713 current standard training, and not designed to replace it.

1714

1715 **Why have you been chosen?**

1716 You are being invited to join the study because you are an ophthalmologist in training at one of the  
1717 collaborating Institutions in East Africa, and you may meet all the eligibility criteria.

1718

1719 **How many people are taking part in this trial?**

1720 We plan to recruit 50 trainees in total: 25 for the SICS intervention training arm, and 25 in the  
1721 standard (control) SICS training arm.

1722

1723

1724

1725 **Procedures**

1726

1727 **What will we ask you to do?**

1728

1729 ***Baseline assessment:***

1730 We will ask you some basic questions cataract and cataract surgery. We will ask you about your  
1731 previous surgical experience.

1732

1733 ***Randomisation:***

1734 Immediately after baseline assessment, we will randomise you to either the first SICS “intervention”  
1735 training group, or the second SICS “control” training group.

1736

1737 ***Further Baseline assessment:***

1738 Whether you have been randomised to the first (“Intervention”) or second (“Control”) group, we will  
1739 show you some of the basics of the procedure of SICS, and the performing of a procedure using  
1740 simulation (artificial eyes). We will then invite you to perform three simulation SICS procedures,  
1741 which we will record (these recordings will be anonymised).

1742

1743 ***Educational Intervention:***

1744 Once you are allocated to one of the groups, you will receive clear instruction on how the timetable  
1745 will run. If you are allocated to the first “Intervention” group, then you will be invited to the Surgical  
1746 Training Unit in Cape Town for an intense eight-day simulation-based training course (over a period  
1747 of ten days). Your flights, accommodation, meals, training (together with all consumables,  
1748 instruments, and educational materials) will be provided free of charge. If you are allocated to the  
1749 second “Control” group, then you will be invited to the Surgical Training Unit in Cape Town for the  
1750 same intense eight day simulation-based training course (over a period of ten days); only this will  
1751 take place after a period of one year.

1752

1753 ***Follow-up assessments:***

1754 We will revisit you at your Training Institution at 3 and 12, and 15 months after your enrolment to  
1755 the study. We will invite you to perform three further simulation SICS procedures (which again we  
1756 will record and anonymise) at 3, 12 and 15 months. We will also, invite you to perform three live  
1757 SICS surgeries (which again we will record and anonymise). During the period between three to  
1758 fifteen months (total one year), we will ask you to monitor, record and report all of the outcomes of  
1759 SICS surgery that you perform in your hospital (in terms of day 1 visual acuity, and incidences of peri-  
1760 operative complications of posterior capsule rupture).

1761

1762 It is critically important to emphasise that you should ***not share any of the learning, lessons,***  
1763 ***materials or experiences in any way between colleagues who are in a different “Intervention” or***  
1764 ***“Control” group*** for at least the first three months (after the first ‘Intervention’ group’s training in  
1765 Cape Town). If you feel this will not be possible, then please to tell us, and we will work with you to  
1766 try to make this possible or if necessary to exclude you from this study. It is also important to  
1767 emphasise that if sharing of the education between the first “Intervention” or second “Control” is  
1768 found, then both individuals will be excluded from the study, and the second “control” individual  
1769 would forfeit their simulation training course in Cape Town at year one. This is really important for  
1770 the integrity of the trial.

1771

1772 **What is the educational intervention that is being tested?**

1773 The surgical education that is being investigated is intense simulation-based surgical training. This  
1774 involves a comprehensive eight-day course, and subsequent three months of practice back home.  
1775 No patients are involved in this training. This training is not meant to replace standard training, but  
1776 to augment it.

1777

1778



1780  
1781  
1782  
1783  
1784  
1785  
1786  
1787  
1788  
1789  
1790  
1791  
1792  
1793  
1794  
1795  
1796  
1797  
1798  
1799  
1800  
1801  
1802  
1803  
1804  
1805  
1806  
1807  
1808  
1809  
1810  
1811  
1812  
1813  
1814  
1815  
1816  
1817  
1818  
1819  
1820  
1821  
1822  
1823  
1824  
1825  
1826  
1827  
1828  
1829  
1830  
1831  
1832

## **Benefits**

### **What benefits are there to taking part in the study?**

You will be offered free simulation-based surgical training in Cape Town. This will be followed up with three months of practice and feedback (remotely via internet) at your normal place of work. All of this training, and the expenses involved will be offered free of charge. No study has been done to investigate the efficacy of simulated ophthalmic surgical education for SICS to this level. You will be helping to answer this question.

## **Risks**

### **What are the risks of taking part?**

There are very low risks associated with participating in this study. You will be away from normal work and training for ten days in Cape Town, South Africa. You will have a colleague who is in the same stage of training, with whom you will not be able to share (initially for at least three months) the learning from this educational intervention. There is a danger that if you are in the "Intervention" group, and you do share some or any of the learning from this course with your matched "Control" colleague, that they will forfeit their training in Cape Town (at year one).

There is however no risk that this training will affect, or reflect on, your current training course marks, future employment, or be reported to your training programme Director.

### **What will happen to the assessment recordings, interviews, feedback, and surgical outcomes data I give?**

The video recordings will be made using the same blue latex-free gloves for all participants, using the same instruments, and the same standard recording equipment. They will also be anonymised so that none of your personal information will be identifiable. These recordings will be stored on an encrypted hard drive in Cape Town and London. Interviews will be recorded and transcribed, anonymised, and thematised: again, no personal identifiable information will be kept. Surgical outcomes of your SICS procedures that you record during the one year period will need to be documented in such a way so they do not include any patient-identifying information. Once this data is reported, none of your personal related information will be made available. Summarised, anonymised data will be including the placement of an anonymized data set in a data repository.

### **Are there any other alternative educational interventions available?**

There is growing evidence that simulation-based surgical education is a valid way to augment surgical training. It is envisaged that in years to come, there will be further local, national, and regional opportunities to engage in this.

## **Withdrawal from the Study**

You have the right to leave a study at any time without penalty. The researchers and sponsor also have the right to stop your participation in this study without your consent if, for example:

- They believe there has been 'contamination' between "Intervention" and "Control" individuals
- You were not to agree to any future changes that may be made in the study plan

## **New Information**

### **What will we do if we find if one educational-intervention is better than the other?**

If we find that intense simulation-based surgical training is better than none, we will publish this finding and envisage that it will lead to further funding for such training.

## **Payment**

You will not be offered payment for being in this study.

1833  
1834  
1835  
1836  
1837  
1838  
1839  
1840  
1841  
1842  
1843  
1844  
1845  
1846  
1847  
1848  
1849  
1850  
1851  
1852  
1853  
1854  
1855  
1856  
1857  
1858  
1859  
1860  
1861  
1862  
1863  
1864  
1865  
1866  
1867  
1868  
1869  
1870  
1871  
1872  
1873  
1874  
1875  
1876  
1877  
1878  
1879  
1880  
1881  
1882  
1883  
1884

**Costs**

There will be no costs to you for participating in this study. You will not be charged for any of the research activities. All transport, accommodation, meals, and materials will be provided free of charge. You will not receive any additional payments or per diems for participating, beyond your normal stipend or salary from your training unit.

**Confidentiality**

**What will happen to the records/interview, and videos we keep of your (simulation) operations?**

All the information and videos we collect will be kept confidential. It will be kept securely and only the primary investigator, or expert markers will have access to it. A study number rather than your name will be used on study records wherever possible. Your name and other facts that might identify you will not appear when we present this study or publish its results. No information from this study will be placed into your ophthalmology training record.

**In Case of Complaint**

**What if there is a problem?**

Any complaint about the way you have been treated during the study will be addressed. Please use the addresses below to contact the study coordinators.

**Who sponsored this study?**

The study is sponsored through the London School of Hygiene and Tropical Medicine.

**Who has reviewed the study?**

This study was reviewed by the British Council for the Prevention of Blindness, the Ulverscroft Foundation (Leicester, UK), CBM-USA, the LSHTM Ethics Review Committee, the University of Cape Town ethics committee, the Nairobi University Ethics Committee, KCMC and NIMR ethics boards in Tanzania, the MURHEC and Makerere Universities Ethics Committees in Uganda, and the ethics board of the University of Zimbabwe.

**Who is doing this study?**

The study will be coordinated by Dr Will Dean who is an ophthalmology consultant who has a MEd (Masters in Education) in Surgical Education at Imperial College, London; a Fellowship of the Royal College of Ophthalmology (UK); over 15 years of experience in ophthalmology and training ophthalmologists in Malawi, Southern Africa and the UK. The recruitment, assessments, and training will be conducted by him, and a small team of specialist ophthalmology consultants.

**Contact Information**

**If you have any questions please ask us:**

- if you have any questions about this study or your part in it, or
- if you have questions, concerns or complaints about the research

Dr. Will Dean at +44 7899 753 953 or +27 710 701 272 or [will.dean@lshtm.ac.uk](mailto:will.dean@lshtm.ac.uk)

Prof. Matthew Burton at +44 20 7636 8636 or [matthew.burton@lshtm.ac.uk](mailto:matthew.burton@lshtm.ac.uk)

**You will be given a copy of the information sheet.  
Thank you for considering taking the time to read this sheet.**

1885  
1886

## Appendix 3a. SICS OSSCAR

Trainee: \_\_\_\_\_ Evaluator: \_\_\_\_\_ Date: \_\_\_\_\_

| Ophthalmic Simulated Surgical Competency Assessment Rubric – Sutureless ECCE (OSSCAR-SICS) |                                                                                      |                                                                                                                            |                                                                                                                                                   |                                                                                                                                  |                                  |
|--------------------------------------------------------------------------------------------|--------------------------------------------------------------------------------------|----------------------------------------------------------------------------------------------------------------------------|---------------------------------------------------------------------------------------------------------------------------------------------------|----------------------------------------------------------------------------------------------------------------------------------|----------------------------------|
|                                                                                            |                                                                                      | Novice<br>(score = 0)                                                                                                      | Advanced Beginner<br>(score = 1)                                                                                                                  | Competent<br>(score = 2)                                                                                                         | Score<br>(Not done<br>score = 0) |
| 1                                                                                          | <b>Scleral fixation</b>                                                              | No scleral fixation; inappropriate place; tissue trauma                                                                    | Appropriate position of scleral fixation, but needs to re-grip. Mild tissue trauma                                                                | Good position of fixation, no need to re-grip, no trauma                                                                         |                                  |
| 2                                                                                          | <b>Paracentesis</b>                                                                  | Chamber collapses on performing paracentesis. Inappropriate width, length and location. Pierces anterior capsule on entry. | Inappropriate location, width or length. Anterior chamber almost stable.                                                                          | Wound of adequate length, width, and correct location.                                                                           |                                  |
| 3                                                                                          | <b>Viscoelastic insertion</b>                                                        | Unsure of when and how much viscoelastic to use. Has difficulty accessing anterior chamber through paracentesis.           | Administers viscoelastic at appropriate time, amount, and cannula position.                                                                       | Viscoelastics administered in appropriate amount, at appropriate time, with cannula tip clear of lens capsule and endothelium.   |                                  |
| 4                                                                                          | <b>Scleral incision</b>                                                              | Inappropriate location, shape and size; hesitant incision.                                                                 | Either one of the incision location, shape or size is incorrect.                                                                                  | Good incision location, shape and size. Firm and stable scleral fixation throughout.                                             |                                  |
| 5                                                                                          | <b>Scleral tunnel</b>                                                                | Inappropriate tunnel depth, hesitant dissection. Button-hole and/or premature entry.                                       | Able to dissect forward, and understands that tunnel depth is incorrect but unable to correct.                                                    | Tunnel constructed at correct place, if inappropriate place, able to rectify.                                                    |                                  |
| 6                                                                                          | <b>Sclero-corneal tunnel</b>                                                         | Does not extend into clear cornea. Button-hole and/or premature entry.                                                     | Does not extend >1mm into clear cornea. Internal tunnel not wider than external.                                                                  | Extends tunnel into clear cornea >1mm, wider limbal corneal tunnel than at scleral incision.                                     |                                  |
| 7                                                                                          | <b>Corneal entry</b>                                                                 | Hesitant keratome entry into AC. Significant shallowing of anterior chamber. Require wound extension or suturing.          | Entry at mostly right plane. Able to extend but with repeated use of viscoelastic. Internal valve irregular. Require wound extension or suturing. | Fluently enters in right plane. Wound length adequate with no further need for extension. Retains viscoelastic during extension. |                                  |
| 8                                                                                          | <b>Capsulotomy / Capsulorhexis start</b>                                             | Tentative, size and position are inadequate for nucleus density, incorrect capsulotomy position.                           | Mostly in control, slow initial start. Capsulotomy in correct position.                                                                           | Correct and smooth start to capsulorhexis. Delicate approach and confident control of cystotomy.                                 |                                  |
| 9                                                                                          | <b>Capsulotomy / Capsulorhexis completion</b>                                        | Tentative, size and position are inadequate for nucleus density, incorrect capsulotomy position. Radial tear               | Mostly in control, few awkward or repositioning movements. Capsulotomy in correct position. Radial tear corrected.                                | Adequate size and position for nucleus density, no tears. AC depth throughout the capsulorhexis.                                 |                                  |
| 10                                                                                         | <b>Hydro-dissection: Visible fluid wave and free prolapse of one pole of nucleus</b> | Hydrodissection fluid not injected in quantity or place to achieve nucleus rotation or prolapse.                           | Fluid injected in appropriate location, able to prolapse one pole of nucleus but encounters more than minimal resistance.                         | Ideally see free fluid wave, adequate for free nuclear hydroprolapse or mechanical prolapse with minimal resistance.             |                                  |
| 11                                                                                         | <b>Injection of visco-elastic</b>                                                    | Doesn't inject visco-elastic into eye                                                                                      | Injects insufficient visco-elastic. Injects only into PC or AC                                                                                    | Injects adequate visco-elastic into capsule bag behind nucleus, and AC                                                           |                                  |

1887

|                       |                                                                           |                                                                                                                                  |                                                                                                                              |                                                                                                                                                                   |  |
|-----------------------|---------------------------------------------------------------------------|----------------------------------------------------------------------------------------------------------------------------------|------------------------------------------------------------------------------------------------------------------------------|-------------------------------------------------------------------------------------------------------------------------------------------------------------------|--|
| 12                    | <b>Prolapse of nucleus partially into AC</b>                              | Unable to dial nucleus into AC. Hooks anterior or posterior nuclear surface, nucleus rotates in the bag, iris and corneal touch. | Multiple attempts required to prolapse upper equator of nucleus into AC with more than minimal resistance. No corneal touch. | Prolapse of upper equator with minimal resistance. No damage to pupil and iris.                                                                                   |  |
| 13                    | <b>Nucleus extraction</b>                                                 | Damages endothelium, iris or capsule, unable to hold and extract nucleus, movements not coordinated. Pierces posterior capsule.  | Removes nucleus after repeated attempts, more than one piece, might need wound extension prior to extraction.                | Extracts nucleus with one or two attempts; proper wound size in relation to nuclear density.                                                                      |  |
| 14                    | <b>IOL insertion</b>                                                      | Grips IOL incorrectly, inserts IOL incorrectly, multiple attempts.                                                               | Hesitant insertion of IOL, more than one attempt to insert                                                                   | Inserts IOL into capsular bag efficiently, correctly, and in first attempt                                                                                        |  |
| <b>GLOBAL INDICES</b> |                                                                           |                                                                                                                                  |                                                                                                                              |                                                                                                                                                                   |  |
| 15                    | <b>Wound Neutrality and Minimizing Eye Rolling and Corneal Distortion</b> | Nearly constant eye movement and corneal distortion.                                                                             | Eye usually in primary position, mild corneal distortion folds occur.                                                        | The eye is kept in primary position during the surgery. No distortion folds are produced. The length and location of incisions prevents distortion of the cornea. |  |
| 16                    | <b>Eye Positioned Centrally Within Microscope View</b>                    | Constantly requires repositioning.                                                                                               | Mild fluctuation in pupil position.                                                                                          | The pupil is kept centered during the surgery.                                                                                                                    |  |
| 17                    | <b>Scleral and Corneal Tissue Handling</b>                                | Tissue handling is rough and damage occurs.                                                                                      | Tissue handling decent but potential for damage exists.                                                                      | Tissue is not damaged nor at risk by handling.                                                                                                                    |  |
| 18                    | <b>Intraocular Spatial Awareness</b>                                      | Instruments often in contact with capsule, iris, corneal endothelium; blunt second instrument not kept in appropriate position.  | Rare contact with capsule, iris, endothelium. Often has blunt second hand instrument in appropriate position.                | No accidental contact with capsule, iris, corneal endothelium. Blunt, second hand instrument, is kept in appropriate position.                                    |  |
| 19                    | <b>Overall Fluidity of Procedure</b>                                      | Hesitant, frequent starts and stops, not at all fluid.                                                                           | Occasional inefficient and/or unnecessary manipulations occur                                                                | Inefficient and/or unnecessary manipulations are avoided                                                                                                          |  |
| 20                    | <b>Overall Speed of Procedure</b>                                         | Case duration more than 15 minutes.                                                                                              | Case duration about 10-15 minutes.                                                                                           | Case duration about 5-10 minutes.                                                                                                                                 |  |
| <b>TOTAL</b>          |                                                                           |                                                                                                                                  |                                                                                                                              |                                                                                                                                                                   |  |

Good Points: \_\_\_\_\_

Suggestions for development: \_\_\_\_\_

*Based on the International Council of Ophthalmology (ICO)-Ophthalmology Surgical Competency Assessment Rubric-SICS (ICO-OSSCAR-SICS)*

1888  
1889





1892

| ICO-Ophthalmology Surgical Competency Assessment Rubric-SICS (ICO-OSCAR: SICS)           |                                                                                                                                                                                                                                                        |                                                                                                                                                                                             |                                                                                                                                                                                     |                                                                                                                                                                                               |                                                 |
|------------------------------------------------------------------------------------------|--------------------------------------------------------------------------------------------------------------------------------------------------------------------------------------------------------------------------------------------------------|---------------------------------------------------------------------------------------------------------------------------------------------------------------------------------------------|-------------------------------------------------------------------------------------------------------------------------------------------------------------------------------------|-----------------------------------------------------------------------------------------------------------------------------------------------------------------------------------------------|-------------------------------------------------|
| Date _____<br>Resident _____                                                             | Novice<br>(score = 2)                                                                                                                                                                                                                                  | Beginner<br>(score = 3)                                                                                                                                                                     | Advanced Beginner<br>(score = 4)                                                                                                                                                    | Competent<br>(score = 5)                                                                                                                                                                      | Not done.<br>Done by<br>preceptor<br>(score= 0) |
| 1<br><b>Draping</b>                                                                      | Unable to start draping without help.                                                                                                                                                                                                                  | Drapes with minimal verbal instruction. Incomplete lash coverage.                                                                                                                           | Lashes mostly covered, drape at most minimally obstructing view.                                                                                                                    | Lashes completely covered and clear of incision site, drape not obstructing view.                                                                                                             |                                                 |
| 2<br><b>Scleral access &amp; Cauterization</b>                                           | Unable to successfully access sclera. Cauterization insufficient or excessive both in intensity and localization.                                                                                                                                      | Accesses sclera but with difficulty and hesitation. Cauterization insufficient or excessive in location or intensity.                                                                       | Achieves good scleral access with mild difficulty. Adequate cauterization.                                                                                                          | Precisely and deftly accesses sclera. Appropriate and precise cauterization.                                                                                                                  |                                                 |
| 3<br><b>Sclerocorneal Tunnel</b>                                                         | Inappropriate incision depth, location, and size, hesitant dissection. Iris prolapse may occur                                                                                                                                                         | One of the following correct: incision depth, location or size. Able to dissect forward but not able to perceive depth                                                                      | Two of the following are correct: incision depth, location or size. Understands that tunnel depth is incorrect but unable to correct.                                               | Good incision depth, location and size. Tunnel constructed at right plane, if inappropriate plane, able to rectify.                                                                           |                                                 |
| 4<br><b>Corneal entry</b>                                                                | Hesitant keratome entry into AC. Unable to extend the internal valve. Significant shallowing of anterior chamber. Require wound extension or suturing.                                                                                                 | Enters into AC but difficulty in extension. Follows a different plane. Entry either anterior or posterior to dissection site. Mild AC shallowing. Require wound extension or suturing.      | Entry at right plane. Able to extend but with repeated use of viscoelastic. Internal valve irregular. Require wound extension or suturing.                                          | Fluently enters in right plane. Wound length adequate with no further need for extension. Retains viscoelastic during extension. Self-sealing, provides good access for surgical maneuvering. |                                                 |
| 5<br><b>Paracentesis &amp; Viscoelastic insertion</b>                                    | Chamber collapses on performing paracentesis. Inappropriate width, length and location. Pierces anterior capsule on entry. Unsure of when, what type and how much viscoelastic to use. Has difficulty accessing anterior chamber through paracentesis. | Appropriate incision width, location or length. Anterior chamber shallows mildly. Requires minimal instruction. Knows when to use but administers incorrect amount or type of viscoelastic. | Inappropriate location, width or length. Anterior chamber almost stable. Requires no instruction. Administers viscoelastic at appropriate time, amount, type, and cannula position. | Wound of adequate length, width, and correct location. Viscoelastics administered in appropriate amount, at appropriate time, with cannula tip clear of lens capsule and endothelium.         |                                                 |
| 6<br><b>Capsulorhexis: Commencement of Flap &amp; follow-through.</b>                    | Instruction required, tentative, chases rather than controls rhexis, cortex disruption may occur.                                                                                                                                                      | Minimal instruction, occasional loss of control of rhexis, cortex disruption may occur.                                                                                                     | In control, few awkward or repositioning movements, no cortex disruption.                                                                                                           | Delicate approach and confident control of the rhexis, no cortex disruption.                                                                                                                  |                                                 |
| 7<br><b>Capsulorhexis: Formation and Circular Completion</b>                             | Size and position are inadequate for nucleus density, tear may occur.                                                                                                                                                                                  | Size and position are barely adequate for nucleus density, difficulty achieving circular rhexis, tear may occur.                                                                            | Size and position are almost exact for nucleus density, shows control, and requires only minimal instruction.                                                                       | Adequate size and position for nucleus density, no tears, rapid, unaided control of radialization, maintains control of the flap and AC depth throughout the capsulorhexis.                   |                                                 |
| 8<br><b>Hydrodissection: Visible Fluid Wave and Free prolapse of one pole of nucleus</b> | Hydrodissection fluid not injected in quantity or place to achieve nucleus rotation or prolapse.                                                                                                                                                       | Multiple attempts required, able to prolapse nuclear pole after multiple efforts. Manually forces nucleus prolapse before adequate hydrodissection; cheese wiring.                          | Fluid injected in appropriate location, able to prolapse one pole of nucleus but encounters more than minimal resistance.                                                           | Ideally see free fluid wave, adequate for free nuclear hydroprolapse or mechanical prolapse with minimal resistance. Aware of contraindications to hydrodissection.                           |                                                 |
| 9<br><b>Prolapse of nucleus completely into AC</b>                                       | Unable to dial nucleus into AC. Hooks anterior or posterior nuclear surface, nucleus rotates in the bag, iris and corneal touch, pupillary constriction, may damage capsule or zonules.                                                                | Prolapses nucleus after repeated awkward attempts, needs instruction, churns cortex causing reduced visibility; iris or corneal touch; no damage to capsule or zonules.                     | Prolapses nucleus into AC with more than minimal resistance. No corneal touch.                                                                                                      | Prolapse with minimal resistance. No damage to pupil and iris.                                                                                                                                |                                                 |
| 10<br><b>Nucleus extraction</b>                                                          | Damages endothelium, iris or capsule, unable to hold and extract nucleus, movements not coordinated.                                                                                                                                                   | Movements coordinated but unable to extract nucleus, iris or corneal damage, unable to assess wound size in relation to nuclear density.                                                    | Removes nucleus after repeated attempts, more than one piece, might need wound extension prior to extraction.                                                                       | Extracts nucleus with one or two attempts; proper wound size in relation to nuclear density.                                                                                                  |                                                 |

1893

|                                                                                                |                                                                                                                                                                                                                                                                                                                                                  |                                                                                                                                                                                                                                                                                                                                                              |                                                                                                                                                                                                                                                                                                                                                |                                                                                                                                                                                                                                                                                                                                                                                              |       |
|------------------------------------------------------------------------------------------------|--------------------------------------------------------------------------------------------------------------------------------------------------------------------------------------------------------------------------------------------------------------------------------------------------------------------------------------------------|--------------------------------------------------------------------------------------------------------------------------------------------------------------------------------------------------------------------------------------------------------------------------------------------------------------------------------------------------------------|------------------------------------------------------------------------------------------------------------------------------------------------------------------------------------------------------------------------------------------------------------------------------------------------------------------------------------------------|----------------------------------------------------------------------------------------------------------------------------------------------------------------------------------------------------------------------------------------------------------------------------------------------------------------------------------------------------------------------------------------------|-------|
| 11<br><b>Irrigation and Aspiration Technique With Adequate Removal of Cortex</b>               | Great difficulty introducing the aspiration tip under the capsulorhexis border, aspiration hole position not controlled, cannot regulate aspiration flow as needed, cannot peel cortical material adequately, engages capsule or iris with aspiration port.                                                                                      | Moderate difficulty introducing aspiration tip under capsulorhexis and maintaining hole up position, attempts to aspirate without occluding tip, shows poor comprehension of aspiration dynamics, cortical peeling is not well controlled, jerky and slow, capsule potentially compromised. Prolonged attempts result in minimal residual cortical material. | Minimal difficulty introducing the aspiration tip under the capsulorhexis, aspiration hole usually up, cortex will engage for 360 degrees, cortical peeling slow, few technical errors, minimal residual cortical material. Some difficulty in removing sub incisional cortex                                                                  | Aspiration tip is introduced under the free border of the capsulorhexis in irrigation mode with the aspiration hole up. Aspiration is activated in just enough flow as to occlude the tip, efficiently removes all cortex. The cortical material is peeled gently towards the center of the pupil, tangentially in cases of zonular weakness. No difficulty in removing subincisional cortex |       |
| 12<br><b>Lens Insertion, Rotation, and Final Position of Intraocular Lens</b>                  | Unable to insert IOL.                                                                                                                                                                                                                                                                                                                            | Difficult insertion, manipulation of IOL, rough handling, unstable anterior chamber. Repeated hesitant attempts placing lower haptic in capsule, repeated attempts rotate upper haptic d into place with excessive force.                                                                                                                                    | Insertion and manipulation of IOL accomplished with minimal anterior chamber instability, the lower haptic is placed with some difficulty, upper haptic is rotated with some stress.                                                                                                                                                           | Insertion and manipulation of IOL is performed in a deep, and stable anterior chamber and capsular bag, with incision appropriate for implant type. The lower haptic is smoothly placed inside the capsular bag; the upper haptic is rotated or gently bent and inserted into place without exerting excessive stress to the capsulorhexis or the zonule fibers.                             |       |
| 13<br><b>Wound Closure (Including Suturing, Hydration, and Checking Security as Required)</b>  | If suturing is needed, instruction is required and stitches are placed in an awkward, slow fashion with much difficulty, astigmatism, bent needles, incomplete suture rotation and wound leakage may result, unable to remove viscoelastics thoroughly, unable to make incision watertight or does not check wound for seal. Improper final IOP. | If suturing is needed, stitches are placed with some difficulty, resuturing may be needed, questionable wound closure with probable astigmatism, instruction may be needed, questionable whether all viscoelastics are thoroughly removed, Extra maneuvers are required to make the incision water tight at the end of the surgery. May have improper IOP.   | If suturing is needed, stitches are placed with minimal difficulty tight enough to maintain the wound closed, may have slight astigmatism, viscoelastics are adequately removed after this step with some difficulty. The incision is checked and is water tight or needs minimal adjustment at the end of the surgery. May have improper IOP. | If suturing is needed, stitches are placed tight enough to maintain the wound closed, but not too tight as to induce astigmatism, viscoelastics are thoroughly removed after this step, the incision is checked and is water tight at the end of the surgery. Proper final IOP.                                                                                                              |       |
| 14<br><b>Global Indices Wound Neutrality and Minimizing Eye Rolling and Corneal Distortion</b> | Nearly constant eye movement and corneal distortion.                                                                                                                                                                                                                                                                                             | Eye often not in primary position, frequent distortion folds.                                                                                                                                                                                                                                                                                                | Eye usually in primary position, mild central distortion folds occur.                                                                                                                                                                                                                                                                          | The eye is kept in primary position during the surgery. No distortion folds are produced. The length and location of incisions prevents distortion of the cornea.                                                                                                                                                                                                                            |       |
| 15<br><b>Eye Positioned Centrally Within Microscope View</b>                                   | Constantly requires repositioning.                                                                                                                                                                                                                                                                                                               | Occasional repositioning required.                                                                                                                                                                                                                                                                                                                           | Mild fluctuation in pupil position.                                                                                                                                                                                                                                                                                                            | The pupil is kept centered during the surgery.                                                                                                                                                                                                                                                                                                                                               |       |
| 16<br><b>Conjunctival and Corneal Tissue Handling</b>                                          | Tissue handling is rough and damage occurs.                                                                                                                                                                                                                                                                                                      | Tissue handling borderline, minimal damage occurs.                                                                                                                                                                                                                                                                                                           | Tissue handling decent but potential for damage exists.                                                                                                                                                                                                                                                                                        | Tissue is not damaged nor at risk by handling.                                                                                                                                                                                                                                                                                                                                               |       |
| 17<br><b>Intraocular Spatial Awareness</b>                                                     | Instruments often in contact with capsule, iris, corneal endothelium; blunt second instrument not kept in appropriate position.                                                                                                                                                                                                                  | Occasional contact with capsule, iris, corneal endothelium; sometimes has blunt second instrument in appropriate position.                                                                                                                                                                                                                                   | Rare contact with capsule, iris, endothelium. Often has blunt second hand instrument in appropriate position.                                                                                                                                                                                                                                  | No accidental contact with capsule, iris, corneal endothelium. Blunt, second hand instrument, is kept in appropriate position.                                                                                                                                                                                                                                                               |       |
| 18<br><b>Iris Protection</b>                                                                   | Iris constantly at risk, handled roughly.                                                                                                                                                                                                                                                                                                        | Iris occasionally at risk. Needs help in deciding when and how to use hooks, ring or other methods of iris protection.                                                                                                                                                                                                                                       | Iris generally well protected. Slight difficulty with iris hooks, ring or other methods of iris protection.                                                                                                                                                                                                                                    | Iris is uninjured. Iris hooks, ring, or other methods are used as needed to protect the iris.                                                                                                                                                                                                                                                                                                |       |
| 19<br><b>Overall Speed and Fluidity of Procedure</b>                                           | Hesitant, frequent starts and stops, not at all fluid.                                                                                                                                                                                                                                                                                           | Occasional starts and stops, inefficient and unnecessary manipulations common, case duration about 60 minutes.                                                                                                                                                                                                                                               | Occasional inefficient and/or unnecessary manipulations occur, case duration about 45 minutes.                                                                                                                                                                                                                                                 | Inefficient and/or unnecessary manipulations are avoided, case duration is appropriate for case difficulty. In general, 30 minutes should be adequate.                                                                                                                                                                                                                                       |       |
| Comments: _____                                                                                |                                                                                                                                                                                                                                                                                                                                                  |                                                                                                                                                                                                                                                                                                                                                              |                                                                                                                                                                                                                                                                                                                                                |                                                                                                                                                                                                                                                                                                                                                                                              | TOTAL |

1894



1896  
1897  
1898  
1899

1900  
1901  
1902  
1903  
1904  
1905  
1906  
1907  
1908  
1909  
1910  
1911  
1912  
1913  
1914  
1915  
1916  
1917  
1918  
1919  
1920  
1921  
1922  
1923  
1924  
1925  
1926  
1927  
1928  
1929  
1930  
1931  
1932  
1933  
1934  
1935  
1936  
1937  
1938  
1939  
1940  
1941  
1942

## Appendix 5a Interview Outline

### In-Depth Interviews

Date: \_\_\_\_\_

ID. : \_\_\_\_\_

#### 1> *Baseline Interview (at selection, pre-randomisation)*

- What are the main challenges (in your area) in surgical training?
- What areas could you use most help with in surgical training?
  - Why?
- Does anything motivate you as a surgeon?

.....

Date: \_\_\_\_\_

#### 2> *During Intervention Training in Cape Town*

- What do training surgeons say are the most important ways to learn surgery?
- How do you, or how have you, learnt surgery?
- What are the main challenges (in your area) in surgical training?
- How do you think surgeons can continually improve their surgical skills?
- Think about the best surgical trainer you have worked with. What made them so good?
- Think about the worst surgical trainer you have worked with. What made them bad?
- What, if any, are the main benefits of simulated ocular surgery training?
- Does anything motivate you as a surgeon?

.....

1943  
1944  
1945  
1946  
1947  
1948  
1949  
1950  
1951  
1952  
1953  
1954  
1955  
1956  
1957  
1958  
1959  
1960

Date: \_\_\_\_\_

3> ***At Year one assessment***

- How, if at all, has the simulation surgical training affected your overall practice as a surgeon over the past year?
  - What aspects of the training?
  
- Does anything motivate you as a surgeon?

***Interviews will be recorded and transcribed, anonymised, and thematised.  
No personal identifiable information will be kept.***

1961 **Appendix 5b Confidence Ratings**

1962

1963

1964 **Ophthalmology Surgical Training** I.D..... Date.....

1965

1966 *We invite you to answer a few simple questions relating to your own views about your surgery and*  
1967 *training. Please be as honest as possible. Your answers will be kept completely anonymous, and will*  
1968 *not be made available to anyone in any identifiable way. Please refer to the Participant Information*  
1969 *Sheet, and do feel free to ask any questions.*

1970

1971 On a scale from one to ten, with 1 being “not confident at all” and 10 being  
1972 “very confident”, please circle the level you most feel at this time:

1973

1974 How do you feel about yourself as an eye surgeon?

1975

|   |   |   |   |   |   |   |   |   |    |
|---|---|---|---|---|---|---|---|---|----|
| 1 | 2 | 3 | 4 | 5 | 6 | 7 | 8 | 9 | 10 |
|---|---|---|---|---|---|---|---|---|----|

Not confident at all Very confident

1976

1977 How do you feel about your own surgical skills?

1978

|   |   |   |   |   |   |   |   |   |    |
|---|---|---|---|---|---|---|---|---|----|
| 1 | 2 | 3 | 4 | 5 | 6 | 7 | 8 | 9 | 10 |
|---|---|---|---|---|---|---|---|---|----|

Not confident at all Very confident

1979

1980 What has impacted your level of confidence?

1981

1982 How do you feel about your cataract surgical skills?

1983

|   |   |   |   |   |   |   |   |   |    |
|---|---|---|---|---|---|---|---|---|----|
| 1 | 2 | 3 | 4 | 5 | 6 | 7 | 8 | 9 | 10 |
|---|---|---|---|---|---|---|---|---|----|

Not confident at all Very confident

1984

1985

1986 What are you most confident about regarding your surgical ability?

1987

1988

1989 What specifically has led to this level of confidence?

1990

1991

1992

1993

1994 **Appendix 6a. Consent to Clinical Photography Form**

1995 **Consent to Clinical Photography Form**

1996 **PATIENT INFORMATION**

1997 **Consenting to Clinical Photography or Video recording**

1998 The Eye Hospital has a policy to give you the right to control the use of  
1999 photographs or video recordings, which may be taken during the course of  
2000 your treatment.

2001 **You can refuse to have photographs or videos taken for any reason other**  
2002 **than for your health records. This will not affect your treatment in any way.**

2003 You have been asked to have medical video recordings taken. These will be for:

2004           Anonymous assessment of your surgery, as part of ongoing evaluation of  
2005           eye surgery and surgery training.

2006           The videos of your surgery will not themselves be published or made  
2007           available in any way to the public.

2008 You will be given information about what the recordings will be used, and will  
2009 be asked to sign a consent form.

2010 **Further Information: If you have any further questions please speak to your**  
2011 **doctor.**

2012 **This leaflet is available in large print and other languages on request.**

2013

2014



2015 **Consent to Clinical Photography/Video and Consent Form**

2016

2017 **Patient Details**

2018 Initials .....

2019 Date of Birth .....

2020 Hospital No.....

I have explained the purpose of clinical photography/recordings to the patient and how the images will be used.

Patient information leaflet has been given.

I am a health professional requesting clinical photography/ video recording.

I will ensure that the appropriate video images are taken in a manner as to ensure that the patient **cannot be identified**.

|  |
|--|
|  |
|  |
|  |
|  |

2021

2022 **Signature of health professional**.....

2023 **Print Name** .....

2024 **Job Title** .....

2025 **Contact details**..... **Date**..... / ..... / .....

**Patient statement** (please circle your answer) I agree to have clinical video recordings done. The request for the same has been explained to me and I fully understand what it entails.

**Yes**

**No**

**Signature of patient** ..... **Date** ...../...../.....

2026

2027 **Statement of Independent Witness / Interpreter**

2028 I have interpreted the above information to the patient to the best of my  
2029 ability and in a way which I believe she or he can understand.

2030 **Interpreter's signature** .....**Name**.....**Date** ...../...../.....

2031

2032 **Appendix 6b. Consent to Clinical Photography Form - Swahili**

2033 **Hati ya Fomu ya Kupiga picha ya Kliniki**

2034 **INFORMATION PATIENT**

2035 **Kukubaliana na Upigaji picha wa Kliniki au Kurekodi Video**

2036 Hospitali ya Jicho ina sera kukupa haki ya kudhibiti matumizi ya picha au rekodi  
2037 za video, ambazo zinaweza kuchukuliwa wakati wa matibabu yako.

2038 **Unaweza kukataa kuwa na picha au video zilizochukuliwa kwa sababu yoyote**  
2039 **isipokuwa kwa kumbukumbu zako za afya. Hii haiathiri matibabu yako kwa**  
2040 **njia yoyote.**

2041 Umeulizwa kuwa na rekodi za video za matibabu zilizochukuliwa. Hizi zitakuwa  
2042 kwa:

2043 Tathmini isiyojulikana ya upasuaji wako, kama sehemu ya tathmini  
2044 inayoendelea ya upasuaji wa macho na mafunzo ya upasuaji.

2045 Video za upasuaji wako hazitasambazwa au zinapatikana kwa njia yoyote  
2046 kwa umma.

2047 Utapewa taarifa kuhusu kile ambacho rekodi zitatumika, na utaombwa kusaini  
2048 fomu ya idhini.

2049 **Maelezo zaidi: Kama una maswali zaidi tafadhali sungumza na daktari wako.**

2050 **Kipeperushi hiki kinapatikana katika lugha kubwa na magazeti mengine kwa**  
2051 **ombi.**

2052

2053

2054 **Ruhusa kwa Upigaji picha / Video na Fomu ya Ruhusa**

2055

2056 **Maelezo ya Mgonjwa**

2057 Jina .....

2058 Tarehe ya kuzaliwa .....

2059 Nambari ya hospitali .....

Nimeelezea madhumuni ya kupiga picha / rekodi za kliniki kwa mgonjwa na jinsi picha zitatumika.

Taarifa ya subira ya wagonjwa imetolewa.

Mimi ni mtaalamu wa afya anaomba kuandika picha za kliniki / video.

Nitahakikisha kuwa picha za video zinazofaa zinachukuliwa kwa namna ya kuhakikisha kwamba **mgonjwa hawezi kutambuliwa.**

2060

2061 **Saini ya mtaalamu wa afya** .....

2062 **Chapa jina** .....

2063 **Jina la kazi** .....

2064 **Maelezo ya mawasiliano** ..... **Tarehe** ..... / ..... / .....

**Taarifa ya subira** (tafadhali duru jibu lako) Nakubali kuwa na rekodi za video za kliniki zilizofanywa. Ombi la sawa limeelezwa kwangu na ninaelewa kikamilifu kile kinachohusu.

**Ndiyo**

**Hapana**

**Saini ya mgonjwa** ..... **Tarehe** ...../...../.....

2065

2066 **Taarifa ya Shahidi wa Uhuru / Mtafsiri**

2067 Nimetafsiri maelezo ya juu kwa mgonjwa kwa uwezo wangu wote na kwa  
2068 njia ambayo ninaamini yeye au anaweza kuelewa.

2069 **Saini ya mkalimani** ..... **Jina**..... **Tarehe** ...../...../.....

2070

2071

|  |
|--|
|  |
|  |
|  |
|  |

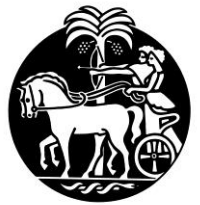

1  
2  
3  
4  
5  
6

**SOP 41**

**Standard Operating Procedure  
Data Analysis Plan**

SOP Ref: LSHTM-SOP-SOS Trials-Simulation v Conventional

Version: 1.1

Author: Dr Will Dean

Effective Date: 19 June 2018

Approved by: Min Kim, David McLeod, John Buchan, Matthew Burton

Signed

Will Dean

19 June 2019

7  
8

| <b>SOP Chronology</b> |             |                                                |               |
|-----------------------|-------------|------------------------------------------------|---------------|
| <b>Version</b>        | <b>Date</b> | <b>Reason for Change</b>                       | <b>Author</b> |
| 1.0                   | 20/8/17     | N/A                                            | WD            |
| 1.1                   | 19/6/18     | Further refinement & locking prior to analyses | WD            |
|                       |             |                                                |               |
|                       |             |                                                |               |

9  
10  
11  
12



## Data Analysis Plan

13

14

15

16 Table of Contents

17

1

18 **1 Introduction**

**3**

19 **2 General Considerations**

**3**

20 2.1 Inclusion and Randomisation

4

21 2.2 Intention to Treat

4

22 **3 Participant flow**

**4**

23 3.1 Flow Diagram

5

24 **4 Data Integrity, Consistency and Range checks**

**6**

25 **5 Description of baseline data**

**6**

26 **6 Primary Analysis**

**6**

27 6.1 Primary outcome measure

6

28 6.2 Analysis of primary outcome measure

7

29 **7 Secondary Analyses**

**8**

30 7.1 Secondary outcome measures

8

31 7.2 Training Record

8

32 7.3 Adverse events

8

33 **8 Qualitative analysis**

**9**

34 **References**

**10**

35

36

37



38

39 **1 Introduction**

40 Globally there are an estimated 36 million people who are blind and a further 217  
41 million with moderate or severe visual impairment.<sup>1</sup> Together, cataract and  
42 glaucoma account for two-thirds of blindness in SSA, and both require surgical  
43 management. There is a huge need for eye surgery. In Sub-Saharan Africa alone,  
44 there are an estimated 4,8 million people who are bilaterally blind, and an estimated  
45 21.4 million who are visually impaired. About 80% of this blindness and visual  
46 impairment is avoidable. The ratio of eye surgeons to population in SSA is 2.6 per  
47 million.<sup>2</sup> If there was a goal to treat all the cataract eyes in people who are blind or  
48 vision impaired, then each ophthalmologist would have a personal backlog of an  
49 average of 15,000 cataract surgeries to perform. Glaucoma may be treated by  
50 surgery as a first line of management, rather than topical medications (eye drops). If  
51 this were the case, then each ophthalmologist would have a backlog of well over 500  
52 surgical trabeculectomies to perform.

53

54 There is a huge need to train eye surgeons. Training opportunities and the number  
55 of trainers are limited. Trainers' time is limited. Surgical training needs to be  
56 accelerated, be more efficient, and be made safer.

57

58 In parts of the world, eye surgeons may be emerging from programmes not  
59 necessarily fully trained. A recent survey of ophthalmology training programmes in  
60 the USA illustrated that in final year residents, that 71.4% had performed <100  
61 cataract surgeries, and 88.6% had performed <10 trabeulectomies.<sup>3</sup> A survey of  
62 ophthalmology residents in China showed that the median number of cataract  
63 surgeries performed was zero.<sup>4</sup>

64

65 Simulation-based surgical education has been shown to rapidly increase the rate of  
66 learning of surgical skills, decrease complication rates, and provide a safe and calm  
67 environment to learn in.<sup>5</sup> however this has not yet been robustly tested or proven  
68 for ophthalmology surgical training.<sup>6</sup>

69

70

71

72



73 **2 General Considerations**

74

75 **2.1 Inclusion and Randomisation**

76

77 Trainee eye doctors from collaborating training institutions in Eastern and Southern  
78 Africa will be assessed for eligibility to either the OLIMPICS trial. Once eligibility  
79 criteria are met, trainee eye doctor participants will be randomised within  
80 institutions.

81

82 **2.2 Intention to Treat**

83

84 All participants' data will be analysed according to their randomisation allocation  
85 irrespective of whether or not they completed all the follow-up assessments.

86

87

88

89 **3 Participant flow**

90

91 The following will be shown by trial arm in a **flowchart** following 2010 CONSORT  
92 statement.<sup>7</sup> Numbers eligible, excluded for different reasons, consenting to take  
93 part, randomized, and who received and did not received the intended treatment.  
94 The numbers still in follow-up, censored, defaulting, and permanently lost-to-follow-  
95 up respectively at each visit and the final number of participants included in the  
96 analyses will also be shown by arm. Reasons for declining to take part, not having the  
97 allocated surgery, or discontinuing follow-up and exclusion from analysis will be  
98 summarized by arm.

99

100



101 **3.1 Flow Diagram**

102

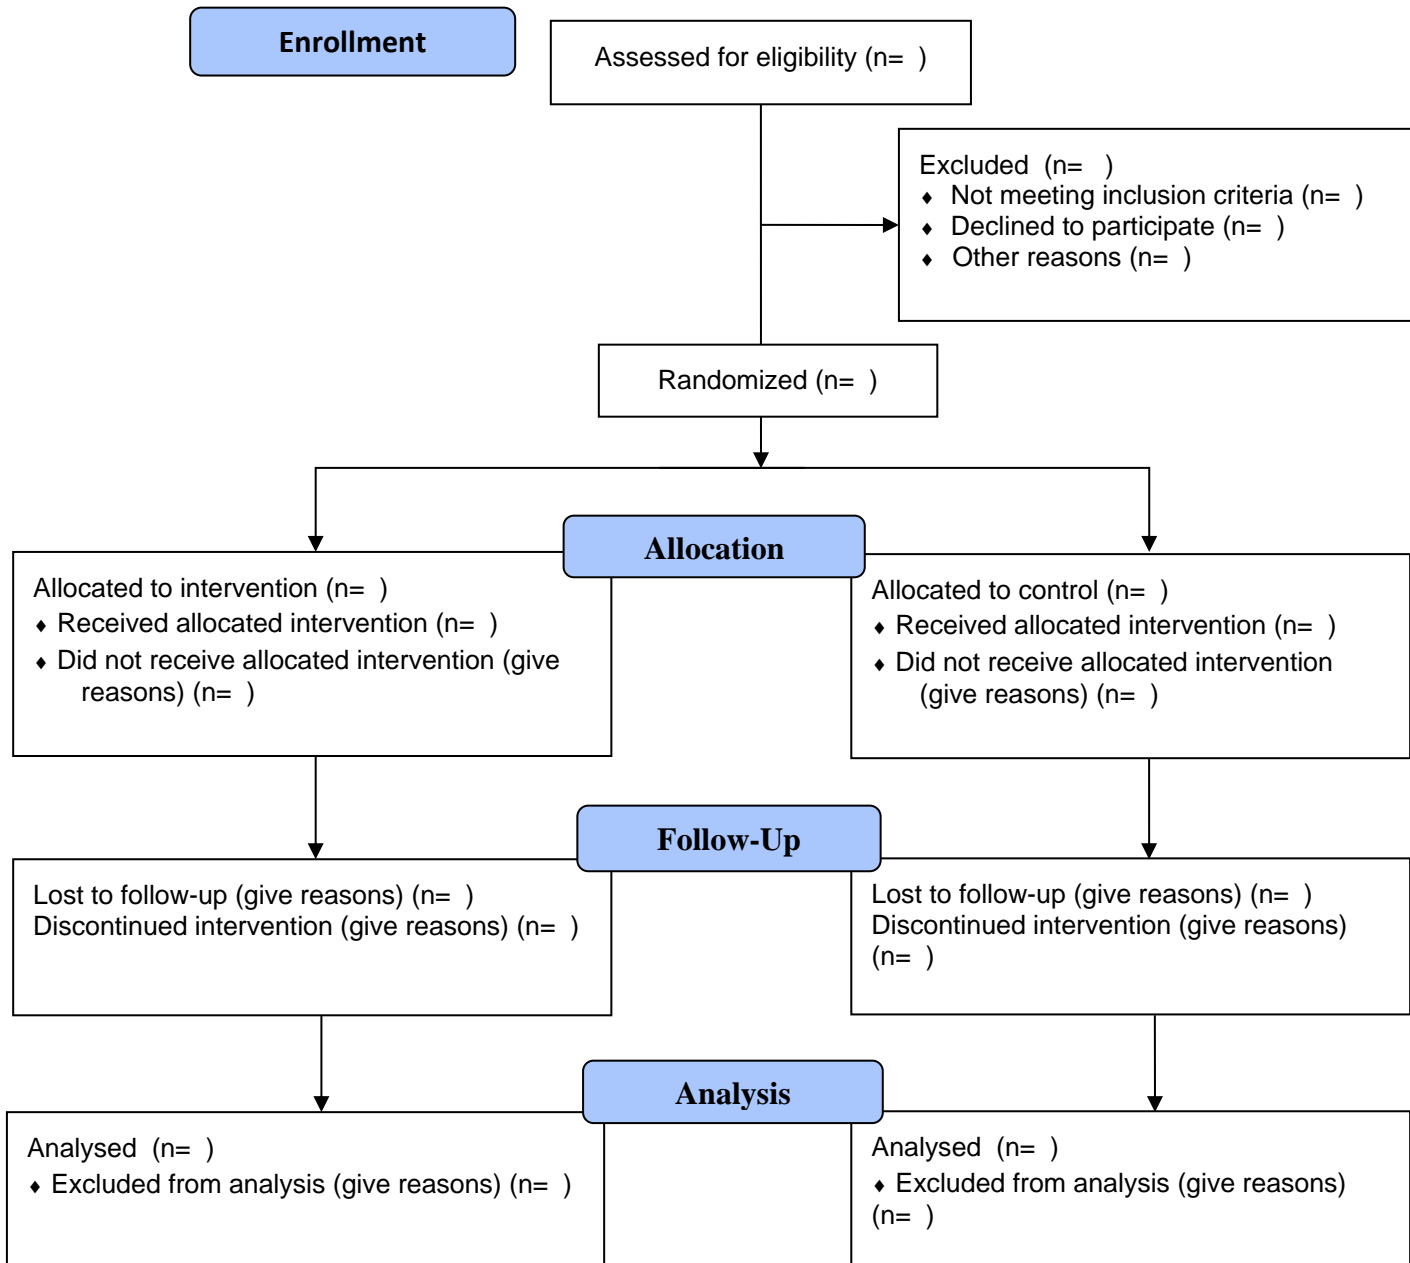





#### 103 **4 Data Integrity, Consistency and Range checks**

104

105 All surgical videos will be graded by two independent masked expert surgeon  
106 assessors. A randomly selected 5% of all videos will be independently marked by the  
107 primary investigator. The randomly-selected 5% of videos will be re-marked by each  
108 grader after a two-month time period. Inter- and intra-observer will be analysed  
109 using Krippendorff's Alpha correlation.

110 A collaborator with no prior access to raw video data will be invited to select more  
111 than ten random videos from libraries of the OLIMPICS trial, and correlate these with  
112 the anonymised videos (given a randomly allocated seven-digit number) to ensure  
113 data integrity. Further random checks will be made on raw data sheets and  
114 computerised data.

115 For numerical variables, such as Sim-OSSCAR scores and confidence ratings, range  
116 checks will be performed using maximum checks. Identified outliers will be double-  
117 checked by the primary investigator.

118

#### 119 **5 Description of baseline data**

120 The following characteristics of participants at baseline will be tabulated by arm:

- 121 a. Number of participants  
122 b. Age (years)  
123 c. Sex, female (%)  
124 d. Geographic Region / City of collaborating institution: Harare / Kampala /  
125 Mbarara / Moshi / Nairobi  
126 e. Knowledge score (30 question standardised MCQ)  
127 f. Pre-intervention surgical experience:  
128 • Total numbers of procedures (performed) (by inclusion criteria should = 0)  
129 • Parts of procedures performed (number)

130

131 The distributions of these variables by treatment arm will be compared, to assess  
132 whether there is imbalance at baseline in these potential confounding factors.

133

#### 134 **6 Primary Analysis**

##### 135 **6.1 Primary outcome measure**

136 Mean global competency assessment score (as a percentage), using the ophthalmic  
137 simulation surgical competency assessment rubric (Sim-OSSCAR) at three-months  
138 post-training intervention. The primary outcome measure is the mean score of three  
139 masked assessments of simulation surgical performance using the Sim-OSSCAR. If  
140 data is missing from one assessment, then the mean of two or one will be used.

141



142 **6.2 Analysis of primary outcome measure**

143 Intention to treat analysis of the Sim-OSSCAR score by arm.

144

145 Primary analysis of primary outcome:

146 It is expected that the important baseline characteristics will be balanced between  
147 the two arms by stratified (for training centre) randomisation. This will be reported  
148 using a Rank Sum or Chi squared test. If this is the case, the outcome in the two arms  
149 will be compared by linear regression model for Sim-OSSCAR at three months,  
150 adjusted for surgical training centre as a fixed effect. Adjustment will be made for  
151 baseline mean Sim-OSSCAR score in the model.

152

153

154 Secondary analysis of primary outcome:

155 *a. Effect modification*

156 We will assess effect modification of the intervention on Sim-OSSCAR score at three  
157 months with the following factors by including an interaction term with treatment  
158 arm in the linear regression model.

159 a. Surgical training centre

160 b. Sex

161 • Male

162 • Female

163 c. Age of trainee: will be classified based on the distribution

164

165 *b. Analysis of determinants of Sim-OSSCAR score:*

166 A multivariable linear regression model will be used to identify potential explanatory  
167 factors for higher scores by three months, adjusting for arm (intervention/control).

168 Other factors which will be examined in a model of Sim-OSSCAR score will include

169 a. Age

170 b. Sex

171 c. Training centre

172

173 *c. Sim-OSSCAR score at end of intervention, at one year and 15-months*

174 Intention-to-treat analysis will be used to assess the impact of the intervention on  
175 OSSCAR score at one-year and 15-months, using linear regression adjusted for  
176 training centre and baseline score, as per the approach used for the primary analysis.

177

178

179



180 **7 Secondary Analyses**

181 **7.1 Secondary outcome measures**

182

183 a. Mean live OSCAR score at one year post-training for OLIMPICS trial.  
184 These will be analysed by linear regression, adjusting for training  
185 centre, as per the approach used for the primary outcome.

186

187 b. Number of surgeries performed over one year (from 0 to 12 months).  
188 Analysed using a Poisson regression, with trial arm as the exposure of  
189 interest, adjusting for training centre.

190

191 c. Patient-specific outcomes for all surgeries performed during 0-15  
192 months for OLIMPICS Trial:

193 i. Day 1 Visual acuity (LogMAR): uncorrected and pin-hole.  
194 Number of patients with good or poor VA per surgeon will be  
195 analysed using Rank Sum.

196 ii. Operative complications of posterior capsule rupture.  
197 Analysed using linear regression.

198

199 d. Confidence rating scores (Assessed at baseline, three and twelve  
200 months), analysed using Wilcoxon Rank Sum test.

201

202 **7.2 Training Record**

203

204 An accurate training record will be maintained and analysed by arm:

205 a. Data will be collected for the duration of the trials (15 months for each  
206 participant) for conventional training: Surgical sessions attended / Numbers  
207 of surgeries performed (supervised and un-supervised) / Assisted. Descriptive  
208 (no formal analysis)

209

210 **7.3 Adverse events**

211 The OLIMPICS and GLASS trials are 'educational-intervention' trials. All the  
212 educational intervention is using simulation. Data will be collected for all  
213 participants in both arms of both trials for all live surgeries performed (under local  
214 supervision, as part of conventional regulated and accredited training).

215

216 Complications will occur during surgery, these complications will be recorded by all  
217 participants (and subsequently summarised and reported to the PI). No patient  
218 identifiable data will be available:

219

220 For the OLIMPICS trial:



- 221           • Posterior capsule tear (with or without vitreous loss)

222

223 For the GLASS trial:

- 224           • Conjunctival button hole

- 225           • Bleb leak

- 226           • Hyphaema

227

228 Within each trial the proportion of surgeries resulting in an adverse event will be  
229 compared using a logistic regression with trial arm as the primary exposure,  
230 adjusting for training centre.

231

232

## 233 **8 Qualitative analysis**

234 Semi-structured interviews (conducted as per Appendix 5a) will be recorded,  
235 transcribed, thematised and analysed. Thematisaion will be performed manually and  
236 electronically using nVivo software (QRS International, Burlington MA, USA).  
237 Confidence ratings do contain elements of open-ended questions which will be  
238 analysed per participant, and per stage of assessment.

239

240

241

242

243



244 **References**

245

246

247 1. Flaxman SR, Bourne RRA, Resnikoff S, et al. Global causes of blindness and  
248 distance vision impairment 1990-2020: a systematic review and meta-  
249 analysis. *Lancet Glob Health* 2017;5(12):e1221-e34. doi: 10.1016/S2214-  
250 109X(17)30393-5 [published Online First: 2017/10/17]

251 2. Palmer JJ, Chinanayi F, Gilbert A, et al. Trends and implications for achieving  
252 VISION 2020 human resources for eye health targets in 16 countries of sub-  
253 Saharan Africa by the year 2020. *Hum Resour Health* 2014;12:45. doi:  
254 10.1186/1478-4491-12-45

255 3. Abdelfattah NS, Radwan AE, Sadda SR. Perspective of ophthalmology residents in  
256 the United States about residency programs and competency in relation to  
257 the International Council of Ophthalmology guidelines. *J Curr Ophthalmol*  
258 2016;28(3):146-51. doi: 10.1016/j.joco.2016.06.001

259 4. Young AL, Jhanji V, Liang Y, et al. A survey of perceived training differences  
260 between ophthalmology residents in Hong Kong and China. *BMC Med Educ*  
261 2015;15:158. doi: 10.1186/s12909-015-0440-0

262 5. Issenberg SB, McGaghie WC, Petrusa ER, et al. Features and uses of high-fidelity  
263 medical simulations that lead to effective learning: a BEME systematic  
264 review. *Med Teach* 2005;27(1):10-28. doi: 10.1080/01421590500046924

265 6. Thomsen AS, Subhi Y, Kiilgaard JF, et al. Update on simulation-based surgical  
266 training and assessment in ophthalmology: a systematic review.  
267 *Ophthalmology* 2015;122(6):1111-30 e1. doi: 10.1016/j.ophtha.2015.02.028

268 7. Schulz KF. Consort 2010 2010 [Available from: [http://www.consort-  
270 statement.org/consort-2010](http://www.consort-<br/>269 statement.org/consort-2010)].
