# Supplementary material for: Intense Simulation-Based Surgical Education for Manual Small-Incision Cataract Surgery: The Ophthalmic Learning and Improvement Initiative in Cataract Surgery Randomized Clinical Trial in Kenya, Tanzania, Uganda, and Zimbabwe
Source: PubMed Central journal article supplement — JAMA Ophthalmol. 2020 Nov 5;139(1):9–15. doi: 10.1001/jamaophthalmol.2020.4718 (PMC7645744; doi:10.1001/jamaophthalmol.2020.4718), 2020-11-05
Supplement: jamaophthalmol-e204718-s002.pdf [file jamaophthalmol-e204718-s002.pdf]

## Data Sharing Statement

Dean. Intense Simulation-Based Surgical Education for Manual Small-Incision Cataract Surgery. *JAMA Ophthalmol*. Published November 05, 2020. 10.1001/jamaophthalmol.2020.4718

### Data

**Data available:** Yes

**Data types:** Deidentified participant data

**How to access data:** [will.dean@lshtm.ac.uk](mailto:will.dean@lshtm.ac.uk)

**When available:** With publication

### Supporting Documents

**Document types:** Informed consent form

**How to access documents:** [will.dean@lshtm.ac.uk](mailto:will.dean@lshtm.ac.uk)

**When available:** With publication

### Additional Information

**Who can access the data:** Anyone requesting data

**Types of analyses:** Specified purpose

**Mechanisms of data availability:** With a signed data access agreement
